# Supplementary material for: Hidradenitis Suppurativa and Comorbid Disorder Biomarkers, Druggable Genes, New Drugs and Drug Repurposing—A Molecular Meta-Analysis
Source: MDPI journal article supplement (doi:10.3390/pharmaceutics14010044), 2021-12-26
Supplement: s1 [file s1]

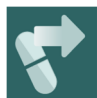

---

# **Supplementary Materials: Hidradenitis Suppurativa and Comorbid Disorder Biomarkers, Druggable Genes, New Drugs and Drug Repurposing—A Molecular Meta-Analysis**

Viktor A. Zouboulis, Konstantin C. Zouboulis and Christos C. Zouboulis

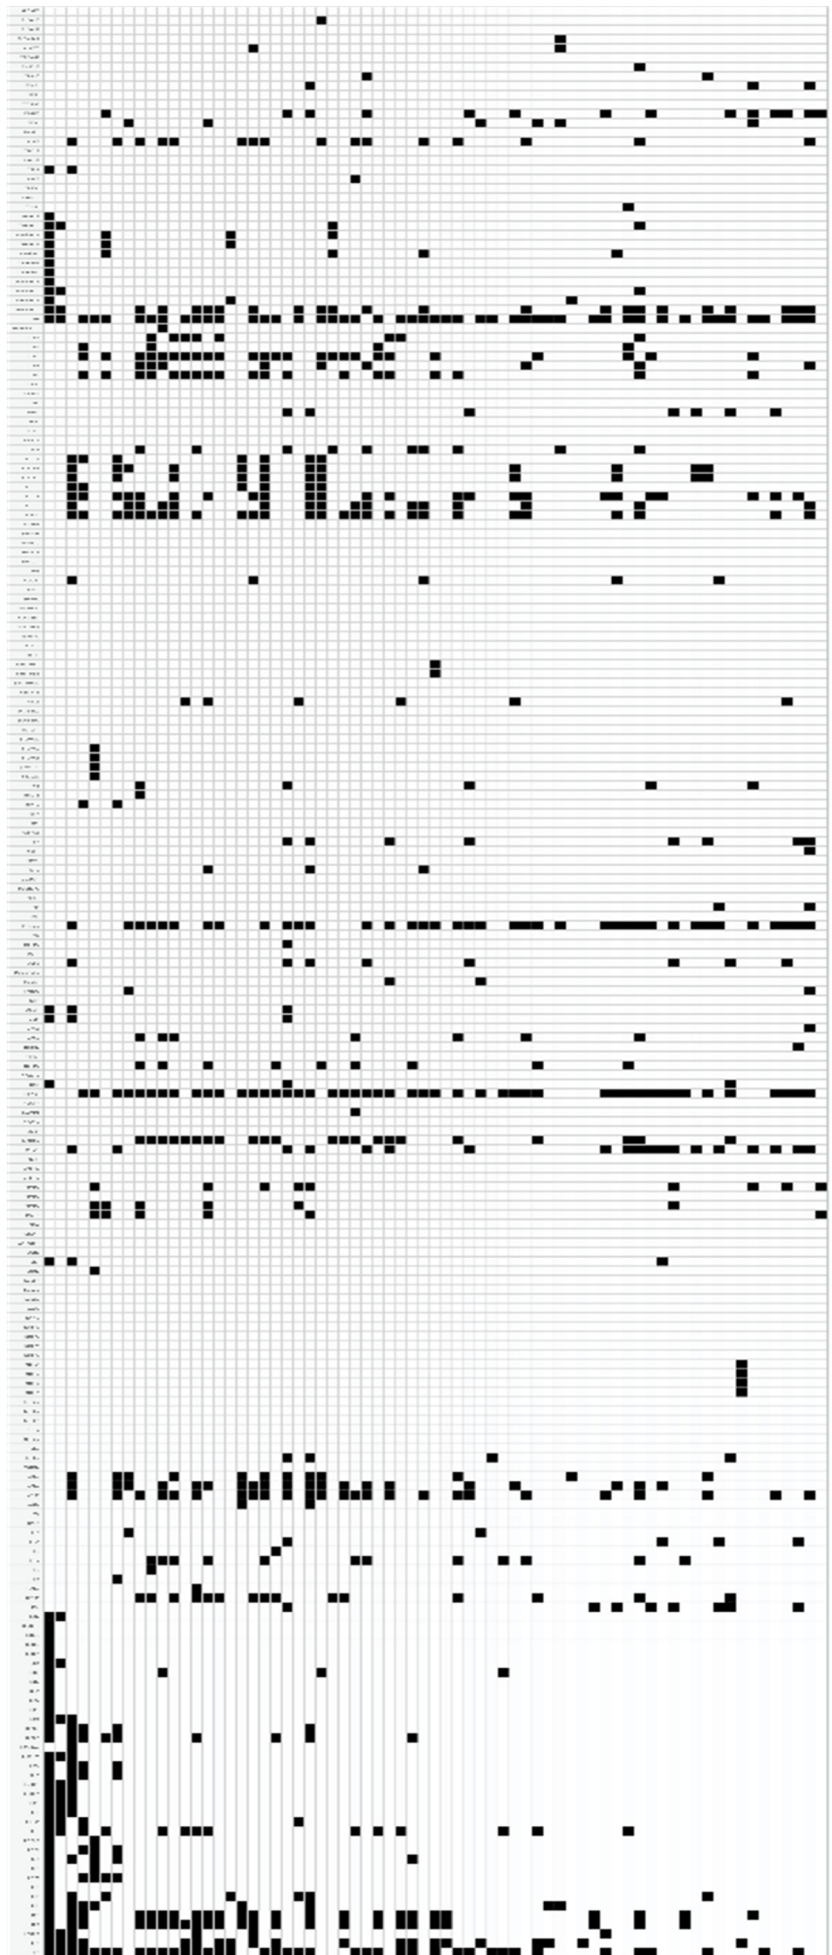

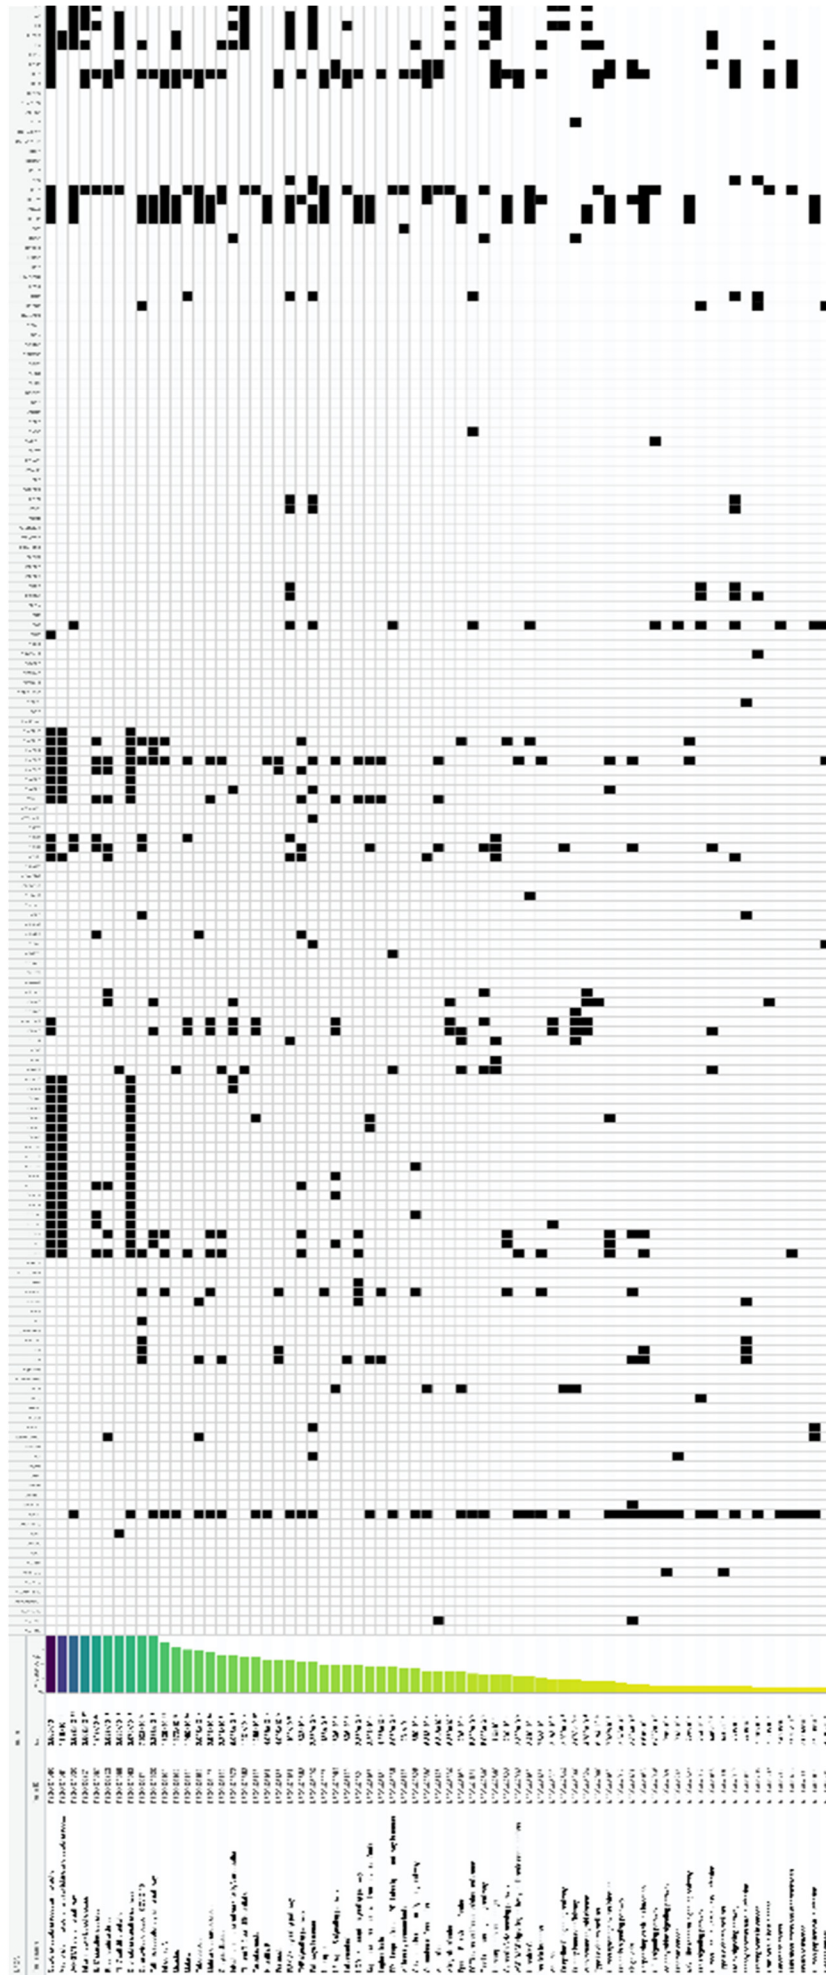



**Figure S1.** Enrichment of HS-associated DEGs (n = 386) resulting from the comparison of transcriptomic profiles and protein expression studies between lesional HS and non-lesional skin biopsies and blood samples from HS patients and healthy controls, respectively, in signaling pathways.

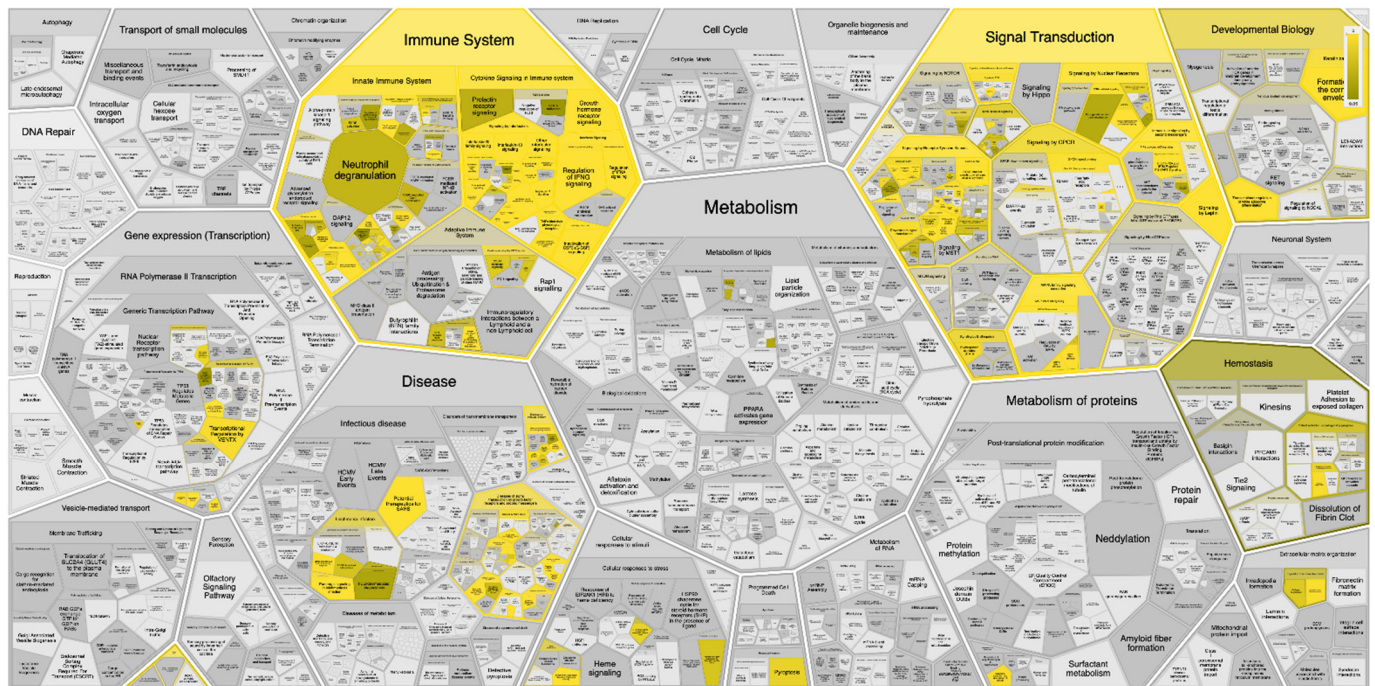

**Figure S2:** Global REAC evaluation of possibly involved signaling pathways in HS. The intensity of yellow areas and letter size indicate the importance of the specific pathways in HS.

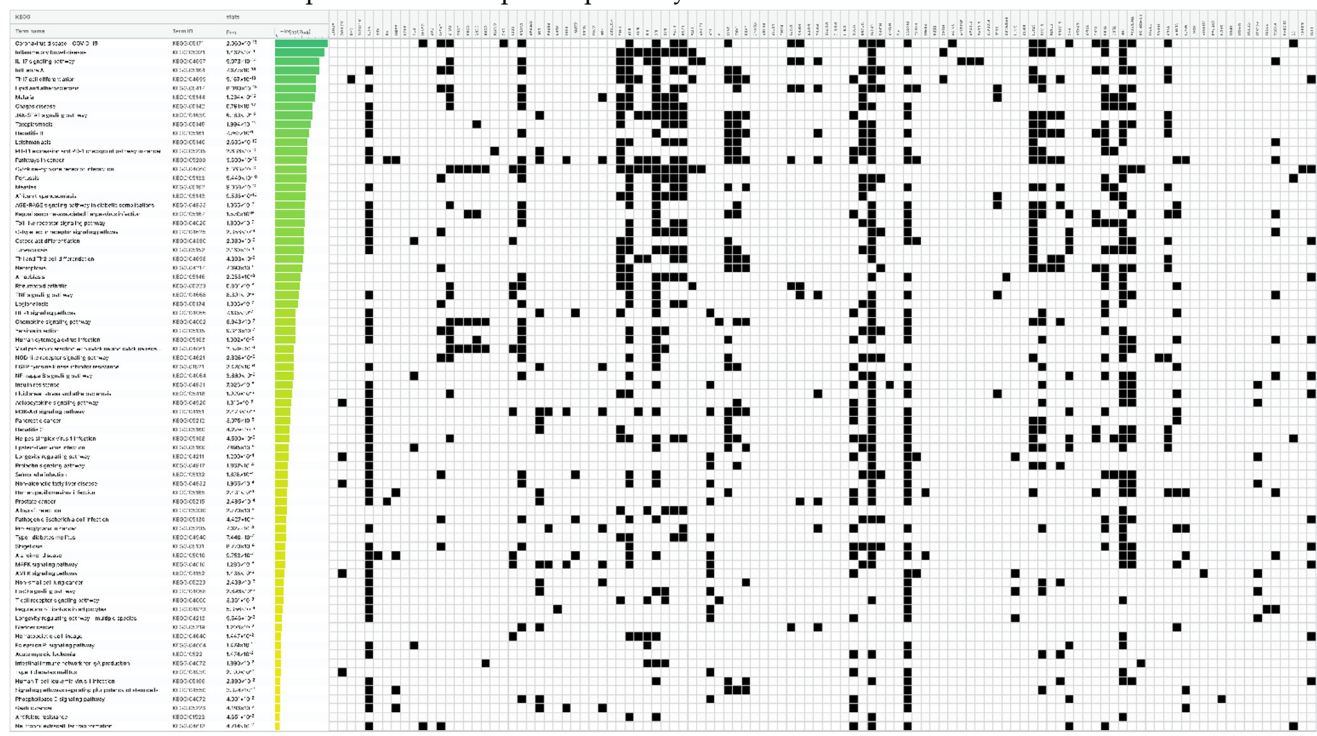

**Figure S3.** Enrichment of druggable HS-associated genes (n = 116) resulting from the comparison of transcriptomic profiles and protein expression studies between lesional HS and non-lesional skin biopsies and blood samples from HS patients and healthy controls, respectively, in signaling pathways.

**Table S1.** DEGs resulting from the comparison of transcriptomic profiles and protein expression studies between lesional HS and non-lesional skin biopsies and blood samples from HS patients and healthy controls, respectively. Bold letters indicate druggable genes. Background: white = result reported in a single study; grey = result reported in at least two independent studies in one target (biological material); orange = result reported in two targets; yellow = result reported in three targets. + = upregulation; - = downregulation; +/- = diversified dysregulation in different biological materials; () = lower level of evidence.

| Gene     | Blood |         | Skin         |         | Gene/protein regulation |
|----------|-------|---------|--------------|---------|-------------------------|
|          | mRNA  | Protein | mRNA         | Protein |                         |
| ACKR2    |       |         | [26]         |         | -                       |
| ACTN4    |       |         | [3]          |         | +                       |
| ADAM12   |       |         | [3,27]       |         | +                       |
| ADAMDEC1 |       |         | [27]         |         | +                       |
| ADAMTS12 |       |         | [26]         |         | -                       |
| ADH1C    |       |         | [3]          |         | -                       |
| ADIPOQ   |       | [28]    | [27]         |         | -                       |
| ADIRF    |       |         | [3]          |         | -                       |
| AGO1     |       |         | [29]         |         | -                       |
| AGO2     |       |         | [29]         |         | -                       |
| AHR      |       |         | [30]         |         | +                       |
| AKR1B10  |       |         | [27]         |         | +                       |
| AKT1     |       |         | [30]         |         | +                       |
| AKT1S1   |       |         | [30]         |         | +                       |
| ALOX5    |       |         | [31]         |         | +                       |
| ALOX5AP  |       |         | [31]         |         | +                       |
| ALOX12   |       |         | [31]         |         | -                       |
| ALOX15   |       |         | [31]         |         | -                       |
| ALOXE3   |       |         | [31]         |         | -                       |
| APELA    |       |         | [27]         |         | +                       |
| APOE     |       |         | [26]         |         | -                       |
| APP      |       |         | [26]         |         | +                       |
| AQP5     |       |         | [32]         |         | -                       |
| AR       |       |         | [3,33,34]    | [35]    | +                       |
| AS3MT    |       |         | [3]          |         | -                       |
| ATP6V0A4 |       |         | [27]         |         | -                       |
| AXIN1    |       |         |              | [36]    | +                       |
| BCL6     |       |         | [30]         |         | +                       |
| BRD4     |       |         | [30]         |         | +                       |
| BTC      |       |         | [3,27,33,34] |         | +/(-)                   |
| BTK      |       |         | [30]         |         | +                       |
| C10orf99 |       |         | [3]          |         | +                       |
| C1QTNF6  |       |         | [3]          |         | +                       |
| C3       |       | [27]    | [30]         |         | -/+                     |
| C5       |       | [37]    |              |         | +                       |
| C5AR1    |       |         | [3,30]       |         | +                       |
| C5orf46  |       |         | [33]         |         | -                       |
| C7       |       |         | [27]         |         | -                       |
| CA6      |       |         | [27]         |         | -                       |
| CAMP     |       |         | [30]         |         | +                       |
| CASP1    |       |         |              | [38,39] | +                       |
| CASP5    |       |         |              | [38]    | +                       |
| CCDC88B  |       |         | [3]          |         | +                       |
| CCDC9    |       |         | [3]          |         | -                       |
| CCL2     |       |         | [40]         |         | +                       |

|        |      |                       |       |
|--------|------|-----------------------|-------|
| CCL4   |      | [41]                  | +     |
| CCL5   |      | [30]                  | +     |
| CCL11  |      | [42]                  | +     |
| CCL17  |      | [30]                  | +     |
| CCL18  |      | [27,30] [43]          | +     |
| CCL19  |      | [26]                  | +     |
| CCL20  |      | [30,44]               | +     |
| CCL21  |      | [26]                  | +     |
| CCL22  |      | [30]                  | -     |
| CCL26  | [41] | [30]                  | +     |
| CCL27  |      | [30,33,44]            | -/(+) |
| CCR2   |      | [30]                  | +     |
| CCR4   | [45] | [30,45]               | +     |
| CCR5   |      | [30]                  | +     |
| CCR6   |      | [30]                  | +     |
| CCR7   |      | [30]                  | +     |
| CCR9   |      | [30]                  | +     |
| CCR10  |      | [30]                  | +     |
| CD3G   |      | [46]                  | +     |
| CD5    |      | [36]                  | +     |
| CD6    |      | [36]                  | +     |
| CD19   |      | [45]                  | +     |
| CD40   |      | [30]                  | +     |
| CD40LG |      | [30]                  | +     |
| CD79a  |      | [45]                  | +     |
| CD80   |      | [30,38]               | +     |
| CD163  |      | [43]                  | +     |
| CD177  |      | [45]                  | +     |
| CD244  |      | [36]                  | +     |
| CD274  |      | [30]                  | +     |
| CDH1   |      | [47]                  | -     |
| CEBPB  |      | [3]                   | +     |
| CERS2  |      | [48]                  | -     |
| CFD    |      | [3]                   | -     |
| CHI3L1 | [49] | [50]                  | +     |
| CLDN8  |      | [27]                  | -     |
| CLEC3B |      | [3]                   | -     |
| COX6B2 |      | [3]                   | -     |
| CPNE5  |      | [3]                   | +     |
| CSF1   |      | [3,33,34,40]          | +     |
| CSF2   |      | [26]                  | +     |
| CSF3   |      | [51]                  | +     |
| CST5   |      | [36]                  | +     |
| CTLA-4 |      | [30]                  | +     |
| CTNNA1 |      | [26]                  | -     |
| CTNND1 |      | [47]                  | -     |
| CXCL1  |      | [27,40,42,44,45] [40] | +     |
| CXCR4  |      | [3]                   | +     |
| CXCR5  |      | [30] [26]             | +     |
| CXCL6  |      | [42]                  | +     |
| CXCL8  |      | [30,42,44] [41]       | +     |
| CXCL9  |      | [30]                  | +     |
| CXCL10 | [41] | [30] [41]             | +/(-) |

|               |                          |        |         |
|---------------|--------------------------|--------|---------|
| CXCL13        | [30,42,45]               | [26]   | +       |
| CYP2W1        | [3]                      |        | -       |
| DCD           | [27,32,33]               | [32]   | -       |
| DEFB1         | [44,46]                  |        | -       |
| DEFB4A        | [3,27,30,32,39,44,45,46] | [3,53] | + / (-) |
| <b>DEFB4B</b> | [54]                     |        | +       |
| DEFB103B      | [46,52]                  |        | +       |
| DGCR8         | [55]                     |        | -       |
| DROSHA        | [55]                     |        | -       |
| DSC2          | [27]                     |        | +       |
| EBI3          | [40]                     |        | +       |
| <b>EGF</b>    | [3,33,34]                |        | +       |
| EHF           | [3]                      |        | +       |
| EPGN          | [3,33,34]                |        | +       |
| <b>ERBB4</b>  | [27,32]                  |        | -       |
| EREG          | [3,33,34]                |        | +       |
| <b>FABP4</b>  | [27]                     |        | -       |
| FABP5         | [3]                      |        | +       |
| FABP7         | [27]                     |        | -       |
| FAM118A       | [3]                      |        | -       |
| FAM74A4       | [3]                      |        | -       |
| FBN2          | [27]                     |        | +       |
| <b>FGF1</b>   | [11]                     |        | +       |
| FGF7          | [11]                     |        | +       |
| FGFBP2        | [27]                     |        | -       |
| FLG           | [30]                     |        | +       |
| FOXA1         | [32]                     |        | -       |
| FOXQ1         | [32]                     |        | -       |
| FUT6          | [3]                      |        | -       |
| <b>GAPDH</b>  | [27]                     |        | +       |
| GAS6          | [3,33,34]                |        | +       |
| GBP6          | [3]                      |        | -       |
| <b>GDNF</b>   | 3,33,34]                 | [36]   | +       |
| GFI1          | [26]                     |        | -       |
| GFOD1         | [3]                      |        | -       |
| GHRL          | [28]                     |        | -       |
| <b>GJB2</b>   | [3]                      | [3]    | +       |
| <b>GPD1</b>   | [3]                      |        | -       |
| GPR155        | [3]                      |        | -       |
| GPR68         | [3]                      |        | +       |
| GSN           | [3]                      |        | -       |
| GZMH          | [30]                     |        | +       |
| HAVCR2        | [30]                     |        | +       |
| HBEGF         | [3,33,34]                |        | +       |
| <b>HGF</b>    | [3,33,34]                |        | +       |
| HIF3A         | [27]                     |        | -       |
| <b>HMGCS2</b> | [27]                     |        | -       |
| HRG           | [3,33,34]                |        | +       |
| HSCB          | [3]                      |        | -       |
| HYAL4         | [3]                      |        | -       |
| ICOS          | [30]                     |        | +       |
| IDO1          | [30]                     |        | +       |
| IFNA1         | [3,26,30,33, 34]         |        | +       |

|            |                             |                                   |                 |       |
|------------|-----------------------------|-----------------------------------|-----------------|-------|
| IFNA2      | [26]                        | +                                 |                 |       |
| IFNB1      | [30]                        | +                                 |                 |       |
| IFNG       | [3,26,30,33,34,40,44,45,46] | +                                 |                 |       |
| IGF2       | [3,33,34]                   | +                                 |                 |       |
| IGH        | [46]                        | +                                 |                 |       |
| IGHD       | [27,30]                     | +                                 |                 |       |
| IGHG3      | [27,30]                     | +                                 |                 |       |
| IGK        | [45]                        | +                                 |                 |       |
| IGKC       | [27]                        | +                                 |                 |       |
| IGKV1D-13  | [27,30]                     | +                                 |                 |       |
| IGKV1ORY-1 | [33]                        | +                                 |                 |       |
| IGKV3-20   | [33]                        | +                                 |                 |       |
| IGL        | [45]                        | +                                 |                 |       |
| IGLL1      | [33]                        | +                                 |                 |       |
| IGLL3P     | [33]                        | +                                 |                 |       |
| IGLV       | [27,30]                     | +                                 |                 |       |
| IGLV3-27   | [45]                        | +                                 |                 |       |
| IKZF2      | [26]                        | -                                 |                 |       |
| IL1A       | [3,26,30,33,34,40]          | [39]                              | +               |       |
| IL1B       | [26,30,38,40,42,46]         | [38,56]                           | +               |       |
| IL1R1      | [30]                        | +                                 |                 |       |
| IL1RN      | [26]                        | -                                 |                 |       |
| IL2        | [26,30]                     | +                                 |                 |       |
| IL2RA      | [49,56]                     | [30]                              | +               |       |
| IL4        | [3,30,33,34,40]             | +                                 |                 |       |
| IL4R       | [30]                        | +                                 |                 |       |
| IL5        | [30]                        | +                                 |                 |       |
| IL6        | [40]                        | [3,26,30,33,34,40,42]             | [40,58]         | +     |
| IL10       |                             | [30,38,44,46]                     | [52,56]         | +     |
| IL10RA     |                             | [26]                              | -               |       |
| IL12A      |                             | [59]                              | [41]            | +     |
| IL12B      |                             | [30]                              | [36]            | +     |
| IL13       |                             | [3,30,45]                         | +/(-)           |       |
| IL15       |                             | [30]                              | +               |       |
| IL16       |                             | [30]                              | [41]            | +     |
| IL17A      | [59]                        | [3,30,33,34,38,39,40,42,44,46,60] | [4,36,38,39,41] | +     |
| IL17C      |                             | [45]                              | -               |       |
| IL17D      |                             | [32]                              | -               |       |
| IL17F      |                             | [30,39,40,42,45]                  | +               |       |
| IL17R      |                             | [3]                               | [4]             | +     |
| IL18       |                             | [26,30]                           | [38]            | +/(-) |
| IL18R1     |                             |                                   | [36]            | +     |
| IL19       |                             | [3,30,40]                         | +               |       |
| IL20       |                             | [30,46]                           | [46]            | +/(-) |
| IL20RA     |                             |                                   | [46]            | -     |
| IL20RB     |                             | [30]                              | +               |       |
| IL21       |                             | [30,39]                           | +               |       |
| IL22       |                             | [3,30,40,42,46]                   | [46]            | +     |
| IL22RA1    |                             | [30]                              | [46]            | -     |
| IL22RA2    |                             |                                   | [46]            | +     |
| IL23A      |                             | [30,40,61]                        | +               |       |
| IL23R      |                             | [30]                              | +               |       |



|          |      |                  |         |   |
|----------|------|------------------|---------|---|
| IL24     |      | [30,42,46]       |         | + |
| IL26     |      | [42,46]          |         | + |
| IL27     |      | [40]             |         | + |
| IL31     |      | [30]             |         | + |
| IL32     |      | [30,40,61]       |         | + |
| IL33     |      | [30]             |         | + |
| IL34     |      | [42]             |         | - |
| IL36A    | [62] | [30,40,42,45,61] | [39,61] | + |
| IL36B    | [62] |                  | [61]    | + |
| IL36G    | [62] | [30,40,42,45]    | [61]    | + |
| IL36RN   |      |                  | [61]    | + |
| IL37     |      | [32,33,42]       |         | - |
| INS      | [63] |                  |         | + |
| IRAK1    |      | [30]             |         | + |
| IRAK2    |      | [30]             |         | + |
| IRF4     |      | [30]             |         | + |
| IRF5     |      | [30]             |         | + |
| IRF7     |      | [26]             |         | + |
| IRF8     |      | [30]             |         | + |
| IRF9     |      | [44]             |         | + |
| IRS1     |      | [30]             |         | + |
| ITK      |      | [30]             |         | + |
| ITPKA    |      | [30]             |         | + |
| IVL      |      | [30]             |         | + |
| JAG2     |      | [26]             |         | - |
| JAK1     |      | [30]             |         | + |
| JAK2     |      | [30]             |         | - |
| JAK3     |      | [3,30]           |         | + |
| KCNN2    |      | [48]             |         | - |
| KITLG    |      | [11]             |         | + |
| KLK6     |      | [30]             |         | + |
| KMT2D    |      | [26]             |         | - |
| KRT2     |      | [33]             |         | - |
| KRT6A    |      | [3,32]           | [3]     | + |
| KRT6B    |      | [3]              |         | + |
| KRT6C    |      | [3]              |         | + |
| KRT14    |      | [3]              |         | + |
| KRT16    |      | [3,27,30,32]     | [3]     | + |
| KRT19    |      | [32]             |         | - |
| KRT31    |      | [32]             |         | - |
| KRT73    |      | [32]             |         | - |
| KRT74    |      | [32]             |         | - |
| KRT77    |      | [27,32,33]       | [32]    | - |
| KRT79    |      | [32]             |         | - |
| KYNU     |      | [30]             |         | + |
| LAG3     |      | [30]             |         | + |
| LCE2B    |      | [33]             |         | - |
| LCE3D    |      | [32]             | [32]    | + |
| LCE5A    |      | [33]             |         | - |
| LCN2     | [64] |                  |         | + |
| LEP      | [28] |                  |         | + |
| LGR5     |      | [27,32]          |         | - |
| LORICRIN |      | [30]             |         | + |

|          |         |                       |        |     |
|----------|---------|-----------------------|--------|-----|
| LTA4H    | [27,65] | [31]                  | -/(+)  |     |
| MAZ      |         | [3]                   | +      |     |
| MMP1     |         | [3,40]                | [3]    | +   |
| MMP3     |         | [40]                  | [40]   | +   |
| MMP8     |         |                       | [66]   | +   |
| MMP9     |         | [3,30,40]             | [3]    | +   |
| MMP10    |         | [40]                  |        | +   |
| MMP12    |         | [27,30]               |        | +   |
| MST1     |         | [3]                   |        | +   |
| MTOR     |         | [30]                  |        | +   |
| MYD88    |         | [26]                  |        | +   |
| MZB1     |         | [33]                  |        | +   |
| NAA40    |         | [31]                  |        | -   |
| NAMPT    | [28,63] |                       |        | +   |
| NCSTN    | [67]    |                       |        | -   |
| NFKB1    |         | [26]                  |        | +   |
| NGF      |         | [3,33,34]             | [36]   | +   |
| NKX2-3   |         | [26]                  |        | -   |
| NLRP3    |         |                       | [38]   | +   |
| NR1D1    |         | [32]                  |        | -   |
| NR1H2    |         | [26]                  |        | -   |
| OAS2     |         | [32]                  |        | +   |
| OASL     |         | [32]                  |        | +   |
| OSM      |         | [3,26]                | [36]   | +   |
| OSMR     |         | [30]                  |        | +   |
| PARD3    |         | [30]                  |        | +   |
| PDCD1    |         | [30]                  |        | +   |
| PDCD1LG2 |         | [30]                  |        | +   |
| PDGFB    |         | [11]                  |        | +   |
| PER1     |         | [32]                  |        | -   |
| PHLPP2   |         | [30]                  |        | +   |
| PI3      |         | [3,27,32,33]          | [3]    | +   |
| PIK3CD   |         | [30]                  |        | +   |
| PIP      |         | [27,32]               |        | -   |
| PKM      | [27]    |                       |        | +   |
| PLIN1    |         | [27,48]               |        | +/- |
| POLR2J2  |         | [3]                   |        | -   |
| POU2AF1  |         | [3]                   |        | +   |
| PPARG    |         | [26]                  |        | -   |
| PRDM1    |         | [30]                  |        | +   |
| PRKRA    |         | [29]                  |        | -   |
| PSEN1    | [67]    |                       |        | -   |
| PTEN     |         | [30]                  |        | +   |
| RASAL3   |         | [3]                   |        | +   |
| RBP4     | [28]    |                       |        | +   |
| RETN     | [28]    |                       |        | +   |
| RORC     |         | [30]                  |        | +   |
| RPL38    |         | [3]                   |        | -   |
| RPS6     |         | [30]                  |        | +   |
| S100A7   |         | [3,30,33,39,42,44,46] | [32]   | +   |
| S100A7A  |         | [3,27,32]             | [3,32] | +   |
| S100A8   | [57]    | [3,33,34,44]          | [3,32] | +   |
| S100A9   | [57]    | [3,27,32,33,42,44,46] | [3,32] | +   |

|                  |                       |        |       |
|------------------|-----------------------|--------|-------|
| <b>S100A12</b>   | [3,30,32,42]          | [3,41] | +     |
| SAPCD1           | [27]                  |        | -     |
| SCGB1D2          | [27,32]               |        | -     |
| SCGB2A2          | [27,32,33]            |        | -     |
| <b>SELE</b>      | [54]                  |        | +     |
| SEMA3E           | [27]                  |        | -     |
| SERPINA12        | [33]                  |        | -     |
| <b>SERPINB3</b>  | [3,27,30]             | [3]    | +     |
| SERPINB4         | [3,27,30]             | [3]    | +     |
| <b>SIRT1</b>     | [26]                  |        | -     |
| <b>SIRT2</b>     |                       | [36]   | +     |
| SLAMF7           | [3,27]                |        | +     |
| SLC16A3          | [3]                   |        | +     |
| SLC35E4          | [3]                   |        | -     |
| SLC66A1          | [3]                   |        | -     |
| SMPD2            | [48]                  |        | +     |
| SND1             | [29]                  |        | -     |
| SOCS1            | [26]                  |        | -     |
| SP8              | [68]                  |        | -     |
| SPPL2A           | [30]                  |        | +     |
| <b>SPRR2B</b>    | [32]                  | [32]   | +     |
| <b>SPRR2C</b>    | [32]                  | [32]   | +     |
| SPRR2F           | [45]                  |        | +     |
| <b>SPRR3</b>     | [3]                   | [3]    | +     |
| <b>STAT1</b>     | [3,26,30,44]          | [36]   | +     |
| STAT2            | [30]                  |        | +     |
| <b>STAT3</b>     | [30]                  |        | +     |
| <b>STAT4</b>     | [30]                  |        | +     |
| STAT5A           | [30]                  |        | +     |
| <b>STAT5B</b>    | [30]                  |        | +     |
| STAT6            | [30]                  |        | +     |
| <b>SYK</b>       | [30]                  |        | +     |
| <b>TBXA2R</b>    | [3]                   |        | -     |
| <b>TCN1</b>      | [3,27,45]             | [3]    | +     |
| TDO2             | [27]                  |        | +     |
| TENT5C           | [33]                  |        | +     |
| TGFA             | [11]                  |        | +     |
| <b>TGM2</b>      | [26]                  |        | +     |
| THRSP            | [27]                  |        | -     |
| THY1             | [3]                   |        | +     |
| TLR2             | [3,68]                |        | +     |
| <b>TLR3</b>      | [26]                  |        | +     |
| <b>TLR4</b>      | [26]                  | [53]   | + / - |
| TLR5             | [3]                   |        | +     |
| <b>TLR9</b>      | [26]                  |        | +     |
| <b>TMPRSS11D</b> | [3]                   | [3]    | +     |
| <b>TNF</b>       | [3,26,30,32,33,38,40] | [56]   | +     |
| <b>TNFRSF1A</b>  | [3]                   |        | +     |
| <b>TNFRSF13B</b> | [30]                  |        | +     |
| TNFRSF14         | [30]                  |        | +     |
| TNFRSF18         | [30]                  |        | +     |
| <b>TNFRSF4</b>   | [45]                  | [45]   | +     |
| TNFRSF9          |                       | [36]   | +     |

|                 |         |      |       |
|-----------------|---------|------|-------|
| TNFSF11         | [30]    | [36] | +     |
| TNFSF13 (APRIL) | [30]    | [26] | +     |
| TNFSF13B (BAFF) | [30]    | [26] | +     |
| TNFSF14         | [30]    | [36] | +     |
| TNFSF18         | [30]    |      | +     |
| TNIP1           | [26,30] |      | + / - |
| TRIM24          | [26]    |      | -     |
| <b>TRPV1</b>    | [30]    |      | +     |
| <b>TRPV2</b>    | [30]    |      | +     |
| TSLP            | [30]    |      | +     |
| TSPAN8          | [27]    |      | -     |
| TTC28           | [3]     |      | -     |
| <b>TYK2</b>     | [30]    |      | +     |
| UCHL1           |         | [69] | -     |
| VAV1            | [30]    |      | +     |
| <b>VEGFA</b>    | [54]    |      | +     |
| WDR97           | [3]     |      | -     |
| WIF1            | [27,32] |      | -     |
| <b>WNT1</b>     | [30]    |      | +     |
| ZFP36           | [26]    |      | -     |
| ZNF713          | [3]     |      | -     |
| ZSCAN2          | [3]     |      | -     |
| ZNF713          | [3]     |      | -     |
| ZSCAN2          | [3]     |      | -     |

**Table S2.** HS-associated DEGs.

| Compound                                  | Function                                                                        | Gene regulation                                                                                                                       | Development phase |
|-------------------------------------------|---------------------------------------------------------------------------------|---------------------------------------------------------------------------------------------------------------------------------------|-------------------|
| 1,2,3,4,5,6-Hexabromocyclohexane          | JAK inhibitor                                                                   | <b>JAK2</b>                                                                                                                           | preclinical       |
| 1-EBIO                                    | potassium channel activator                                                     | KCNN1, <b>KCNN2</b> , KCNN3, KCNN4                                                                                                    | preclinical       |
| 1-Octanol                                 | Aliphatisches alcohol                                                           | GJA1, GJA10, GJA3, GJA4, GJA5, GJA8, GJA9, GJB1, <b>GJB2</b> , GJB3, GJB4, GJB5, GJB6, GJB7, GJC1, GJC2, GJC3, GJD2, GJD3, GJD4, GJE1 | 2                 |
| 2-Aminobenzenesulfonamide                 | carbonic anhydrase inhibitor                                                    | CA12, CA14, CA2, <b>CA6</b> , CA9                                                                                                     | preclinical       |
| 2-APB                                     | 1,4,5-trisphosphate inhibitor                                                   | TRPC1, TRPC3, TRPC4, TRPC5, TRPC6, TRPC7, TRPM2, TRPM3, TRPM6, <b>TRPV1</b> , TRPV6                                                   | preclinical       |
| 2,4-Dinitrophenol                         | ATP synthase inhibitor                                                          | <b>APP</b>                                                                                                                            | preclinical       |
| 2-Hydroxyflutamide                        | AR antagonist                                                                   | <b>AR</b>                                                                                                                             | 2                 |
| 3-Methyladenine                           | PI3K inhibitor                                                                  | <b>PI3</b>                                                                                                                            | preclinical       |
| 3,3'-Diindolylmethane                     | CHK inhibitor, cytochrome P450 activator, indoleamine 2,3-dioxygenase inhibitor | <b>AR</b> , HIF1A, <b>IFNG</b> , <b>PI3</b>                                                                                           | 3                 |
| 3,4-Methylenedioxy- $\beta$ -nitrostyrene | SRC inhibitor, SYK inhibitor                                                    | SRC, <b>SYK</b>                                                                                                                       | preclinical       |
| 4,5,6,7-Tetrabromobenzotriazole           | casein kinase inhibitor                                                         | <b>AKT1</b> , CHEK1, CSNK2A1, GSK3B, LCK, MAP2K1, MAPK1, MAPK11, MAPK12, MAPK14, MAPK8, PRKCA, ROCK1, RPS6KB1, SGK1                   | preclinical       |
| 6-Iodo-nordihydrocapsaicin                | TRPV antagonist                                                                 | <b>TRPV1</b>                                                                                                                          | preclinical       |
| $\alpha$ -Linolenic acid                  | $\omega$ 3 fatty acid stimulant                                                 | ELOVL4, FADS1, FADS2, FFAR1, FFAR4, <b>PTGS2</b> , SLC8A1, <b>TRPV1</b>                                                               | 3                 |
| A-1120                                    | retinoid receptor ligand                                                        | <b>RBP4</b>                                                                                                                           | preclinical       |
| A205804                                   | ICAM1 expression inhibitor                                                      | ICAM1, <b>SELE</b>                                                                                                                    | preclinical       |
| A-674563                                  | AKT inhibitor                                                                   | <b>AKT1</b> , PKIA, PRKACA                                                                                                            | preclinical       |
| A-784168                                  | transient receptor potential channel antagonist                                 | <b>TRPV1</b>                                                                                                                          | preclinical       |
| Abametapir                                | metalloproteinase inhibitor                                                     | <b>MMP9</b>                                                                                                                           | 3                 |
| Acalabrutinib                             | Bruton's tyrosine kinase (BTK) inhibitor                                        | <b>BTK</b>                                                                                                                            | launched          |
| Acalisib                                  | PI3K inhibitor                                                                  | PIK3CB, <b>PIK3CD</b>                                                                                                                 | 1                 |
| Aceneuramic acid                          | sialic acid                                                                     | CES1, <b>SELE</b> , SELP                                                                                                              | 3                 |
| Acetohydroxamic acid                      | urease inhibitor                                                                | <b>MMP12</b>                                                                                                                          | launched          |
| Acetyl-farnesyl-cysteine                  | methyltransferase inhibitor                                                     | <b>PPARG</b>                                                                                                                          | launched          |
| Acitretin                                 | retinoid receptor agonist                                                       | <b>KRT16</b> , <b>PI3</b> , RARA, RARB, RARG, RBP1, RXRA, RXRB, RXRG, <b>STAT3</b>                                                    | launched          |
| Adalimumab                                | TNF inhibitor                                                                   | <b>TNFA</b>                                                                                                                           | launched          |
| Adaptavir                                 | CC chemokine receptor antagonist                                                | <b>CCR5</b>                                                                                                                           | 2                 |
| Adiporon                                  | adiponectin receptor agonist                                                    | <b>ADIPOR1</b> , <b>ADIPOR2</b>                                                                                                       | preclinical       |
| AG-490                                    | EGFR inhibitor, JAK inhibitor                                                   | <b>EGFR</b> , <b>JAK2</b> , <b>JAK3</b>                                                                                               | preclinical       |
| AK-7                                      | SIRT inhibitor                                                                  | <b>SIRT2</b>                                                                                                                          | preclinical       |
| AKBA                                      | Lipoxygenase inhibitor                                                          | <b>ALOX5</b>                                                                                                                          | 3                 |
| Alantolactone                             | apoptosis stimulant, STAT inhibitor                                             | <b>STAT3</b>                                                                                                                          | preclinical       |
| Allicin                                   | cytokine production inhibitor                                                   | TRPA1, <b>TRPV1</b>                                                                                                                   | 2                 |
| Alpelisib                                 | PI3K inhibitor                                                                  | PIK3CA, PIK3CB, <b>PIK3CD</b> , PIK3CG                                                                                                | launched          |
| AMD11070                                  | CC chemokine receptor antagonist                                                | <b>CCR5</b> , CXCR4                                                                                                                   | 3                 |

|                   |                                                                                    |                                                                                                                                                                                           |             |
|-------------------|------------------------------------------------------------------------------------|-------------------------------------------------------------------------------------------------------------------------------------------------------------------------------------------|-------------|
| AM-24             | lipoxygenase inhibitor                                                             | <b>ALOX5</b>                                                                                                                                                                              | 2           |
| AM679             | cannabinoid receptor agonist,<br>lipoxygenase inhibitor                            | <b>ALOX5AP</b> , CNR1, CNR2                                                                                                                                                               | preclinical |
| AMG-319           | PI3K inhibitor                                                                     | <b>PIK3CD</b>                                                                                                                                                                             | 2           |
| Amiloride         | sodium channel blocker                                                             | AOC1, ASIC1, ASIC2, ASIC3, PKD2,<br>PKD2L1, PLA2, SCNN1A, SCNN1B,<br>SCNN1D, SCNN1G, SLC9A1, TRPC7,<br><b>TRPV2</b>                                                                       | launched    |
| Aminosalicylate   | cyclooxygenase inhibitor                                                           | <b>ALOX5</b> , CHUK, PLA2G2E, PTGS1, PTGS2                                                                                                                                                | launched    |
| Amlexanox         | histamine receptor modulator                                                       | <b>FGF1</b> , IL3, PDE4A, PDE4B, PDE4C,<br>PDE4D, <b>S100A12</b> , S100A13                                                                                                                | launched    |
| Amrinone          | phosphodiesterase inhibitor                                                        | PDE3A, PDE3B, PDE4B, <b>TNFA</b>                                                                                                                                                          | launched    |
| Anandamide        | cannabinoid receptor agonist                                                       | CACNA1G, CACNA1H, CACNA1I,<br>CNR1, CNR2, GLRA1, GPR18, GPR55,<br>KCNA2, KCNK3, KCNK9, TRPM8,<br><b>TRPV1</b>                                                                             | 2           |
| Andrographolide   | tumor necrosis factor production<br>inhibitor                                      | <b>IL1B</b> , <b>IL6</b> , <b>NFKB1</b> , <b>NFKB2</b> , <b>TNFA</b>                                                                                                                      | 2           |
| APcK-110          | KIT inhibitor                                                                      | <b>KIT</b> , <b>STAT3</b>                                                                                                                                                                 | preclinical |
| API1903           | mTOR inhibitor                                                                     | <b>MTOR</b>                                                                                                                                                                               | 1 / 2       |
| API-1             | AKT inhibitor                                                                      | <b>AKT1</b> , AKT2, AKT3                                                                                                                                                                  | preclinical |
| Apratastat        | matrix metalloprotease inhibitor,<br>tumor necrosis factor production<br>inhibitor | ADAM17, <b>MMP1</b> , <b>MMP13</b> , <b>MMP9</b>                                                                                                                                          | 2           |
| Apremilast        | phosphodiesterase inhibitor                                                        | <b>IFNG</b> , PDE4A, PDE4B, PDE4C, PDE4D                                                                                                                                                  | launched    |
| APY0201           | phosphoinositide dependent<br>kinase inhibitor                                     | <b>IL12A</b> , <b>IL12B</b> , PIKFYVE                                                                                                                                                     | preclinical |
| Arglabin          | farnesyltransferase inhibitor                                                      | FNTA, <b>NFKB1</b>                                                                                                                                                                        | launched    |
| ARV-825           | bromodomain inhibitor                                                              | <b>BRD4</b>                                                                                                                                                                               | preclinical |
| Aspartame         | non-saccharide sweetener                                                           | TAS1R2, <b>TRPV1</b>                                                                                                                                                                      | launched    |
| Aspirin           | cyclooxygenase inhibitor                                                           | AKR1C1, ASIC3, EDNRA, HSPA5, IKBKB,<br><b>NFKB1</b> , NFKB2, NFKBIA, PRKAA1,<br>PRKAA2, <b>PRKAB1</b> , PRKAB2, PRKAG1,<br>PRKAG2, PRKAG3, <b>PTGS1</b> , <b>PTGS2</b> ,<br>RPS6KA3, TP53 | launched    |
| AT13148           | Protein kinase inhibitor                                                           | <b>AKT1</b> , AKT2, AKT3, ROCK1, ROCK2,<br>SGK3                                                                                                                                           | 1           |
| AT-9283           | Aurora kinase inhibitor, JAK<br>inhibitor                                          | AURKA, AURKB, <b>JAK2</b> , <b>JAK3</b> , RPS6KA6,<br>STK17A                                                                                                                              | 2           |
| Atiprimod         | JAK inhibitor, STAT inhibitor                                                      | <b>JAK2</b> , <b>STAT3</b>                                                                                                                                                                | 2           |
| Atorvastatin      | HMGCR inhibitor                                                                    | <b>AHR</b>                                                                                                                                                                                | launched    |
| Atractylenolide-i | JAK inhibitor                                                                      | <b>JAK1</b> , <b>JAK2</b> , <b>JAK3</b>                                                                                                                                                   | preclinical |
| AVL-292           | Bruton's tyrosine kinase (BTK)<br>inhibitor                                        | <b>BTK</b> , YES1                                                                                                                                                                         | 2           |
| Axitinib          | PDGFR tyrosine kinase receptor<br>inhibitor, VEGFR inhibitor                       | <b>CSF1</b> , FLT1, FLT4, KDR, PLK4                                                                                                                                                       | launched    |
| AZ20              | ATR kinase inhibitor                                                               | ATR, <b>MTOR</b>                                                                                                                                                                          | preclinical |
| AZ876             | PPAR $\gamma$ agonist                                                              | <b>PPARG</b>                                                                                                                                                                              | preclinical |
| AZ960             | JAK inhibitor                                                                      | <b>JAK2</b>                                                                                                                                                                               | preclinical |
| AZD1480           | JAK inhibitor                                                                      | <b>JAK1</b> , <b>JAK2</b> , <b>JAK3</b>                                                                                                                                                   | 1           |
| AZD2014           | mTOR inhibitor                                                                     | <b>MTOR</b>                                                                                                                                                                               | 2           |
| AZD5363           | AKT inhibitor                                                                      | <b>AKT1</b> , AKT2, AKT3                                                                                                                                                                  | 3           |
| AZD6482           | PI3K inhibitor                                                                     | PIK3CA, PIK3CB, <b>PIK3CD</b> , PIK3CG                                                                                                                                                    | 1           |
| AZD8055           | mTOR inhibitor                                                                     | <b>MTOR</b>                                                                                                                                                                               | 1           |
| AZD8186           | PI3K inhibitor                                                                     | PIK3CB, <b>PIK3CD</b>                                                                                                                                                                     | 1           |



|                                      |                                                                                                                                                                                 |                                                                                               |             |
|--------------------------------------|---------------------------------------------------------------------------------------------------------------------------------------------------------------------------------|-----------------------------------------------------------------------------------------------|-------------|
| AZD8835                              | PI3K inhibitor                                                                                                                                                                  | PIK3CA, <b>PIK3CD</b>                                                                         | 1           |
| Baicalein                            | lipoxygenase inhibitor                                                                                                                                                          | <b>ALOX5</b> , GLO1, PREP, SELL, SELP, <b>TNFA</b> , XDH                                      | preclinical |
| Balsalazide                          | cyclooxygenase inhibitor                                                                                                                                                        | <b>ALOX5</b> , <b>PPARG</b> , <b>PTGS1</b> , <b>PTGS2</b>                                     | launched    |
| Bardoxolone                          | nuclear factor erythroid derived/like (NRF2) activator                                                                                                                          | NOS2, <b>PPARG</b>                                                                            | 1           |
| Bardoxolone-methyl                   | nuclear factor erythroid derived/like (NRF2) activator                                                                                                                          | <b>PPARG</b> , <b>STAT3</b>                                                                   | 3           |
| Baricitinib                          | JAK inhibitor                                                                                                                                                                   | <b>JAK1</b> , <b>JAK2</b>                                                                     | launched    |
| Batimastat                           | matrix metalloprotease inhibitor                                                                                                                                                | ADAM28, ADAMTS5, <b>MMP12</b> , MMP16, MMP2, <b>MMP8</b>                                      | 3           |
| BAY-61-3606                          | SYK inhibitor                                                                                                                                                                   | <b>SYK</b>                                                                                    | preclinical |
| BCTC                                 | TRPV antagonist                                                                                                                                                                 | <b>TRPV1</b>                                                                                  | preclinical |
| Bergenin                             | interleukin inhibitor                                                                                                                                                           | <b>IL1B</b> , <b>TNFA</b>                                                                     | preclinical |
| $\beta$ -Amyloid-synthesis-inhibitor | $\beta$ -amyloid synthesis inhibitor                                                                                                                                            | <b>APP</b>                                                                                    | preclinical |
| $\beta$ -Elemene                     | apoptosis stimulant                                                                                                                                                             | MMP2, <b>MMP9</b>                                                                             | launched    |
| $\beta$ -hydroxy-beta-Methylbutyrate | protein synthesis stimulant                                                                                                                                                     | <b>MTOR</b>                                                                                   | launched    |
| Bezafibrate                          | PPAR agonist                                                                                                                                                                    | PPARA, PPARD, <b>PPARG</b>                                                                    | launched    |
| BGT226                               | PI3K inhibitor                                                                                                                                                                  | <b>MTOR</b> , PIK3CA, PIK3CB, PIK3CG                                                          | 1 / 2       |
| Bicalutamide                         | AR antagonist                                                                                                                                                                   | <b>AR</b>                                                                                     | launched    |
| BI-2536                              | PLK inhibitor                                                                                                                                                                   | <b>BRD4</b> , PLK1, PLK2, PLK3                                                                | 2           |
| Bindarit                             | NF $\kappa$ B pathway inhibitor                                                                                                                                                 | <b>CCL2</b> , CCL7, CCL8                                                                      | 2           |
| Bisindolylmaleimide-IX               | PKC inhibitor                                                                                                                                                                   | <b>AKT1</b> , GSK3B, LCK, MAPK1, MAPK11, MAPK12, MAPK14, MAPK8, PRKCA, ROCK1, RPS6KB1, SIRT1  | preclinical |
| Bisphenol-A                          | synthetic estrogen                                                                                                                                                              | <b>AR</b> , ESR1, ESR2, ESRRG, <b>PPARG</b>                                                   | 1           |
| Bleomycin                            | EGFR expression inhibitor                                                                                                                                                       | <b>EGFR</b>                                                                                   | launched    |
| BMS-536924                           | IGF-1 inhibitor                                                                                                                                                                 | <b>AKT1</b> , CCNE1, CDK2, <b>CYP3A4</b> , ERBB2, IGF1R, KDR, LCK, MAPK1, MET, PDGFRA, PDGFRB | preclinical |
| BMS-754807                           | IGF-1 inhibitor                                                                                                                                                                 | <b>AKT1</b> , IGF1R                                                                           | 2           |
| BMS-777607                           | AXL kinase inhibitor, c-Met inhibitor, FLT3 inhibitor, hepatocyte growth factor receptor inhibitor, macrophage migration inhibiting factor inhibitor, tyrosine kinase inhibitor | AXL, MERTK, MET, <b>MST1R</b> , TYRO3                                                         | 1 / 2       |
| BMS-779788                           | Liver X receptor agonist                                                                                                                                                        | <b>LXR</b>                                                                                    | 1           |
| BMS-911543                           | JAK inhibitor                                                                                                                                                                   | <b>JAK1</b> , <b>JAK2</b> , <b>JAK3</b>                                                       | 1 / 2       |
| BMS-935177                           | Bruton's tyrosine kinase (BTK) inhibitor                                                                                                                                        | <b>BTK</b>                                                                                    | preclinical |
| BMS-986142                           | Bruton's tyrosine kinase (BTK) inhibitor                                                                                                                                        | <b>BTK</b>                                                                                    | 2           |
| BMS-986158                           | bromodomain inhibitor                                                                                                                                                           | <b>BRD4</b>                                                                                   | 1 / 2       |
| BMS-986195                           | Bruton's tyrosine kinase (BTK) inhibitor                                                                                                                                        | <b>BTK</b>                                                                                    | 1           |
| BMS-CCR2-22                          | CC chemokine receptor antagonist                                                                                                                                                | <b>CCR2</b>                                                                                   | preclinical |
| Brodalumab                           | IL-17 receptor inhibitor                                                                                                                                                        | <b>IL17R</b> , <b>KRT6A</b> , <b>S100A7A</b> , <b>S100A8</b> , <b>S100A9</b>                  | launched    |
| BTK-IN-1                             | Bruton's tyrosine kinase (BTK) inhibitor                                                                                                                                        | <b>BTK</b>                                                                                    | preclinical |
| BW-A4C                               | lipoxygenase inhibitor                                                                                                                                                          | <b>ALOX5</b>                                                                                  | 1           |
| BW-B70C                              | lipoxygenase inhibitor                                                                                                                                                          | <b>ALOX5</b>                                                                                  | preclinical |

|                      |                                                                    |                                                                                                                                                                                                                                                                          |             |
|----------------------|--------------------------------------------------------------------|--------------------------------------------------------------------------------------------------------------------------------------------------------------------------------------------------------------------------------------------------------------------------|-------------|
| C-021                | CC chemokine receptor antagonist                                   | <b>CCR4</b>                                                                                                                                                                                                                                                              | preclinical |
| C34                  | toll-like receptor inhibitor                                       | <b>TLR4</b>                                                                                                                                                                                                                                                              | preclinical |
| Caffeic acid         | lipoxygenase inhibitor, tumor necrosis factor production inhibitor | <b>ALOX5</b> , MIF                                                                                                                                                                                                                                                       | preclinical |
| Caffeine             | adenosine receptor antagonist, phosphodiesterase inhibitor         | ADORA1, ADORA2A, ADORA2B, ADORA3, ATM, ITPR1, ITPR2, ITPR3, PDE10A, PDE11A, PDE1A, PDE1B, PDE1C, PDE2A, PDE3A, PDE3B, PDE4A, PDE4B, PDE4C, PDE4D, PDE5A, PDE6A, PDE6B, PDE6C, PDE7A, PDE7B, PDE8A, PDE8B, PDE9A, PIK3CA, PIK3CB, <b>PIK3CD</b> , PRKDC, RYR1, RYR2, RYR3 | launched    |
| CaMKII-IN-1          | calcium/calmodulin dependent protein kinase inhibitor              | <b>AKT1</b> , CAMK2A, CAMK4, MYLK                                                                                                                                                                                                                                        | preclinical |
| Canertinib           | EGFR inhibitor                                                     | <b>AKT1</b> , EGFR, ERBB2, ERBB4                                                                                                                                                                                                                                         | 3           |
| Captopril            | angiotensin converting enzyme inhibitor                            | ACE, <b>LTA4H</b> , MMP2, <b>MMP9</b>                                                                                                                                                                                                                                    | launched    |
| Carbenoxolone        | 11-beta hydroxysteroid dehydrogenase inhibitor                     | GJA1, GJA10, GJA3, GJA4, GJA5, GJA8, GJA9, GJB1, <b>GJB2</b> , GJB3, GJB4, GJB5, GJB6, GJB7, GJC1, GJC2, GJC3, GJD2, GJD3, GJD4, GJE1, HSD11B1, PANX1, PANX2, PANX3                                                                                                      | launched    |
| Carboxyamidotriazole | calcium channel blocker                                            | <b>CXCL8</b>                                                                                                                                                                                                                                                             | 3           |
| Carzenide            | Carbonic anhydrase IX inhibitor                                    | CA1, CA12, CA14, CA2, <b>CA6</b> , CA9                                                                                                                                                                                                                                   | preclinical |
| CB-03-01             | AR antagonist                                                      | <b>AR</b>                                                                                                                                                                                                                                                                | 3           |
| CBS-1114             | lipoxygenase inhibitor                                             | <b>ALOX5</b>                                                                                                                                                                                                                                                             | 1           |
| CC-115               | DNA protein kinase inhibitor, mTOR inhibitor                       | <b>MTOR</b>                                                                                                                                                                                                                                                              | 2           |
| CC-223               | mTOR inhibitor                                                     | <b>MTOR</b>                                                                                                                                                                                                                                                              | 2           |
| CH223191             | Aryl hydrocarbon receptor antagonist                               | <b>AHR</b>                                                                                                                                                                                                                                                               | preclinical |
| CHF5074              | $\gamma$ -secretase modulator                                      | <b>PSEN1</b>                                                                                                                                                                                                                                                             | 2           |
| Chrysophanic acid    | EGFR inhibitor                                                     | <b>EGFR</b> , <b>MTOR</b>                                                                                                                                                                                                                                                | preclinical |
| CEP-33779            | JAK inhibitor                                                      | <b>JAK2</b>                                                                                                                                                                                                                                                              | preclinical |
| Certolizumab pegol   | TNF inhibitor                                                      | <b>TNFA</b>                                                                                                                                                                                                                                                              | launched    |
| CH5132799            | PI3K inhibitor                                                     | <b>MTOR</b> , PIK3CA, PIK3CB, <b>PIK3CD</b> , PIK3CG                                                                                                                                                                                                                     | 1           |
| Cholic acid          | bile acid synthesis disorders, peroxisomal disorders               | <b>ADH1C</b>                                                                                                                                                                                                                                                             | launched    |
| Ciglitazone          | PPAR $\gamma$ agonist                                              | <b>GPD1</b> , <b>PPARG</b> , <b>TBXA2R</b>                                                                                                                                                                                                                               | 2           |
| CINPA-1              | CAR antagonist                                                     | <b>NR1H4</b> , NR1I3, <b>PPARG</b>                                                                                                                                                                                                                                       | preclinical |
| Cipemastat           | metalloproteinase inhibitor                                        | ADAM17, <b>MMP1</b> , MMP13, MMP2, <b>MMP3</b> , <b>MMP8</b> , <b>MMP9</b>                                                                                                                                                                                               | 3           |
| Citric acid          | coagulation factor inhibitor                                       | AKR1B1, ANG, APRT, BHMT, C8G, CA4, CPB1, CS, CTDSP1, GNMT, HGS, HS3ST3A1, IL4I1, ITPA, LSM6, MDH2, MIF, PDE5A, PKD2L1, PLEKHA1, RNASE1, RNASE3, SRC, <b>TNFSF13B</b> , UCK2                                                                                              | preclinical |
| CKD-712              | NF $\kappa$ B pathway inhibitor                                    | <b>JAK2</b> , <b>STAT1</b>                                                                                                                                                                                                                                               | 1           |
| Cloprostenol-(+/-)   | prostaglandin receptor agonist                                     | PTGDR, PTGER1, PTGER3, PTGFR, <b>TBXA2R</b>                                                                                                                                                                                                                              | launched    |
| CNX-774              | Bruton's tyrosine kinase (BTK) inhibitor                           | <b>BTK</b>                                                                                                                                                                                                                                                               | preclinical |

|                  |                                                                                                                                                                                                                                                                                                                                                                                                                                                                                                                                                                                                                                                                                                                                                                                                                                                                                                                                                                                                                                                                                                                                                          |                                                                                                                                                              |             |   |
|------------------|----------------------------------------------------------------------------------------------------------------------------------------------------------------------------------------------------------------------------------------------------------------------------------------------------------------------------------------------------------------------------------------------------------------------------------------------------------------------------------------------------------------------------------------------------------------------------------------------------------------------------------------------------------------------------------------------------------------------------------------------------------------------------------------------------------------------------------------------------------------------------------------------------------------------------------------------------------------------------------------------------------------------------------------------------------------------------------------------------------------------------------------------------------|--------------------------------------------------------------------------------------------------------------------------------------------------------------|-------------|---|
| Coenzyme-I       | AASS, ACADS, ADH1A, ADH1B, <b>ADH1C</b> , ADH4, ADH5, ADH7, AKR1B1, AKR1C1, AKR1C2, AKR1C3, AKR1C4, ALDH1A1, ALDH1A2, ALDH1A3, ALDH1B1, ALDH2, ALDH3A1, ALDH3A2, ALDH3B1, ALDH3B2, ALDH4A1, ALDH5A1, ALDH6A1, ALDH7A1, ALDH9A1, AMT, BDH1, BLVRA, BLVRB, CDO1, CYB5R3, CYP17A1, CYP4A11, DHCR7, DHFR, DLAT, DLD, EHHADH, <b>GAPDH</b> , GAPDHS, GLUD1, GLUD2, <b>GPD1</b> , GSR, H6PD, HADH, HADHA, HIBADH, HMGCR, HMOX1, HMOX2, HPGD, HSD11B1, HSD11B2, HSD17B1, HSD17B10, HSD17B2, HSD17B3, HSD17B4, HSD17B7, HSD17B8, HSD3B1, HSD3B2, IDH3A, IDH3B, IDH3G, IMPDH1, IMPDH2, LDHA, LDHAL6A, LDHAL6B, LDHB, LDHC, MDH1, MDH2, ME1, ME2, ME3, MSMO1, MT-ND1, MT-ND2, MT-ND3, MT-ND4, MT-ND4L, MT-ND5, MT-ND6, MTHFD1, MTHFD2, NDUFA1, NDUFA10, NDUFA11, NDUFA12, NDUFA13, NDUFA2, NDUFA3, NDUFA4, NDUFA4L2, NDUFA5, NDUFA6, NDUFA7, NDUFA8, NDUFA9, NDUFAB1, NDUFB1, NDUFB10, NDUFB2, NDUFB3, NDUFB4, NDUFB5, NDUFB6, NDUFB7, NDUFB8, NDUFB9, NDUFC1, NDUFC2, NDUFS1, NDUFS2, NDUFS3, NDUFS4, NDUFS5, NDUFS6, NDUFS7, NDUFS8, NDUFV1, NDUFV2, NDUFV3, NNT, NQO2, NSDHL, OGDH, PDHA1, PDHA2, PDHB, PHGDH, PYCR1, PYCR2, QDPR, RDH5, SORD, TSTA3, TYR, UGDH |                                                                                                                                                              |             | 2 |
|                  |                                                                                                                                                                                                                                                                                                                                                                                                                                                                                                                                                                                                                                                                                                                                                                                                                                                                                                                                                                                                                                                                                                                                                          |                                                                                                                                                              |             |   |
| Compound-401     | DNA dependent protein kinase inhibitor                                                                                                                                                                                                                                                                                                                                                                                                                                                                                                                                                                                                                                                                                                                                                                                                                                                                                                                                                                                                                                                                                                                   | <b>MTOR</b> , PRKDC                                                                                                                                          | preclinical |   |
| Copanlisib       | PI3K inhibitor                                                                                                                                                                                                                                                                                                                                                                                                                                                                                                                                                                                                                                                                                                                                                                                                                                                                                                                                                                                                                                                                                                                                           | PIK3CA, PIK3CB, <b>PIK3CD</b> , PIK3CG                                                                                                                       | launched    |   |
| CP-471474        | matrix metalloprotease inhibitor                                                                                                                                                                                                                                                                                                                                                                                                                                                                                                                                                                                                                                                                                                                                                                                                                                                                                                                                                                                                                                                                                                                         | <b>MMP1</b> , MMP13, MMP2, <b>MMP3</b> , <b>MMP9</b>                                                                                                         | preclinical |   |
| CPI-1189         | tumor necrosis factor release inhibitor                                                                                                                                                                                                                                                                                                                                                                                                                                                                                                                                                                                                                                                                                                                                                                                                                                                                                                                                                                                                                                                                                                                  | <b>TNFA</b>                                                                                                                                                  | 2           |   |
| Cortodoxone      | AR antagonist                                                                                                                                                                                                                                                                                                                                                                                                                                                                                                                                                                                                                                                                                                                                                                                                                                                                                                                                                                                                                                                                                                                                            | <b>AR</b>                                                                                                                                                    | 3           |   |
| Coumarin         | vitamin K antagonist                                                                                                                                                                                                                                                                                                                                                                                                                                                                                                                                                                                                                                                                                                                                                                                                                                                                                                                                                                                                                                                                                                                                     | CA1, CA12, CA14, CA2, CA4, <b>CA6</b> , CA9, CYP2A6                                                                                                          | launched    |   |
| CPI-0610         | bromodomain inhibitor                                                                                                                                                                                                                                                                                                                                                                                                                                                                                                                                                                                                                                                                                                                                                                                                                                                                                                                                                                                                                                                                                                                                    | <b>BRD4</b>                                                                                                                                                  | 2           |   |
| CPI-203          | bromodomain inhibitor                                                                                                                                                                                                                                                                                                                                                                                                                                                                                                                                                                                                                                                                                                                                                                                                                                                                                                                                                                                                                                                                                                                                    | <b>BRD4</b>                                                                                                                                                  | preclinical |   |
| Cryptotanshinone | acetylcholinesterase inhibitor, STAT inhibitor                                                                                                                                                                                                                                                                                                                                                                                                                                                                                                                                                                                                                                                                                                                                                                                                                                                                                                                                                                                                                                                                                                           | <b>STAT3</b>                                                                                                                                                 | preclinical |   |
| CTS-1027         | metalloproteinase inhibitor                                                                                                                                                                                                                                                                                                                                                                                                                                                                                                                                                                                                                                                                                                                                                                                                                                                                                                                                                                                                                                                                                                                              | <b>MMP1</b> , MMP13, MMP2, <b>MMP3</b> , <b>MMP9</b>                                                                                                         | 2           |   |
| CU-CPT-4a        | toll-like receptor inhibitor                                                                                                                                                                                                                                                                                                                                                                                                                                                                                                                                                                                                                                                                                                                                                                                                                                                                                                                                                                                                                                                                                                                             | <b>TLR3</b>                                                                                                                                                  | preclinical |   |
| Curcumin         | cyclooxygenase inhibitor, histone acetyltransferase inhibitor, lipoxygenase inhibitor, NFκB pathway inhibitor                                                                                                                                                                                                                                                                                                                                                                                                                                                                                                                                                                                                                                                                                                                                                                                                                                                                                                                                                                                                                                            | <b>APP</b> , CA1, CA12, CA14, CA2, CA4, <b>CA6</b> , CA9, CHRM3, <b>CYP3A4</b> , DNMT3B, EP300, MMP13, <b>MMP9</b> , NOS2, <b>PTGS1</b> , <b>PTGS2</b> , XDH | launched    |   |

|                     |                                                                                                                                               |                                                                                                                                          |             |
|---------------------|-----------------------------------------------------------------------------------------------------------------------------------------------|------------------------------------------------------------------------------------------------------------------------------------------|-------------|
| Curcumol            | JAK inhibitor                                                                                                                                 | <b>JAK1, JAK2, JAK3</b>                                                                                                                  | 1           |
| Cyproterone acetate | AR antagonist                                                                                                                                 | <b>ADORA1, AR</b>                                                                                                                        | launched    |
| Cyt387              | JAK inhibitor                                                                                                                                 | <b>JAK1, JAK2, JAK3</b>                                                                                                                  | 3           |
| Danazol             | estrogen receptor antagonist, progesterone receptor agonist                                                                                   | <b>AR, CCL2, ESR1, GNRHR, GNRHR2, PGR</b>                                                                                                | launched    |
| Darglitazone        | PPAR $\gamma$ agonist                                                                                                                         | <b>PPARG</b>                                                                                                                             | 2           |
| Darolutamide        | AR antagonist                                                                                                                                 | <b>AR</b>                                                                                                                                | launched    |
| Dasatinib           | Bcr-Abl kinase inhibitor, ephrin inhibitor, KIT inhibitor, PDGFR tyrosine kinase receptor inhibitor, SRC inhibitor, tyrosine kinase inhibitor | <b>ABL1, ABL2, BLK, EPHA2, FGR, FRK, FYN, HCK, KIT, LCK, LYN, PDGFRB, SRC, SRMS, STAT5B, YES1</b>                                        | launched    |
| DCEBIO              | potassium channel activator                                                                                                                   | <b>KCNN2, KCNN3, KCNN4</b>                                                                                                               | preclinical |
| D-serine            | glutamate receptor agonist                                                                                                                    | <b>GLRA1, GRIN1, GRIN2A, GRIN2B, GRIN2C, GRIN2D, SERPINB3</b>                                                                            | launched    |
| Decernotinib        | JAK inhibitor                                                                                                                                 | <b>JAK3</b>                                                                                                                              | 2 / 3       |
| Deforolimus         | mTOR inhibitor                                                                                                                                | <b>MTOR</b>                                                                                                                              | 3           |
| Delgocitinib        | JAK inhibitor                                                                                                                                 | <b>JAK1, JAK2, JAK3</b>                                                                                                                  | 2           |
| Dexfosfoserine      | membrane integrity inhibitor                                                                                                                  | <b>CFTR, GRM4, GRM6, GRM7, GRM8, KCNC4, PDPK1, PIM1, PRKACA, PRKCQ, PYGL, PYGM, REG1A, RHO, SERPINB3, SMAD2, TAOK2</b>                   | preclinical |
| Diacerein           | interleukin inhibitor                                                                                                                         | <b>IL1B</b>                                                                                                                              | launched    |
| Diclofenac          | cyclooxygenase inhibitor                                                                                                                      | <b>AKR1C3, ALOX5, ASIC1, ASIC3, KCNQ2, KCNQ3, PLA2G2A, PPARG, PTGS1, PTGS2, SCN4A</b>                                                    | launched    |
| Diethylcarbamazine  | lipoxygenase inhibitor                                                                                                                        | <b>ALOX5, PTGS1</b>                                                                                                                      | launched    |
| Dinoprost           | prostacyclin analog                                                                                                                           | <b>PTGDR, PTGDR2, PTGER1, PTGER2, PTGER3, PTGER4, PTGFR, TBXA2R</b>                                                                      | launched    |
| Docebenone          | lipoxygenase inhibitor                                                                                                                        | <b>ALOX5</b>                                                                                                                             | 2           |
| Doxycycline         | bacterial 30S ribosomal subunit inhibitor, metalloproteinase inhibitor                                                                        | <b>MMP1, MMP8, PI3</b>                                                                                                                   | launched    |
| Dupilumab           | interleukin receptor antagonist                                                                                                               | <b>IL4R</b>                                                                                                                              | launched    |
| Duvelisib           | PI3K inhibitor                                                                                                                                | <b>PIK3CA, PIK3CB, PIK3CD, PIK3CG</b>                                                                                                    | launched    |
| Edaglitazone        | PPAR $\gamma$ agonist                                                                                                                         | <b>PPARG</b>                                                                                                                             | 2           |
| Efatutazone         | PPAR $\gamma$ agonist                                                                                                                         | <b>PPARG</b>                                                                                                                             | 2           |
| Elafibranor         | PPAR agonist                                                                                                                                  | <b>PPARA, PPARD, PPARG</b>                                                                                                               | 3           |
| Ellagic acid        | glutathione transferase inhibitor, non-nucleoside reverse transcriptase inhibitor                                                             | <b>CA1, CA12, CA14, CA2, CA3, CA4, CA5A, CA5B, CA6, CA7, CA9, CSNK2A1, GSK3B, PRKACA, PRKCA, PRKCB, SQLE, SYK</b>                        | 2           |
| Emricasan           | caspase inhibitor                                                                                                                             | <b>CASP1, CASP3, CASP7</b>                                                                                                               | 2           |
| Enzalutamide        | AR antagonist                                                                                                                                 | <b>AR</b>                                                                                                                                | launched    |
| Enzastaurin         | PKC inhibitor                                                                                                                                 | <b>AKT1, GSK3B, PRKCA, PRKCB, PRKCD, PRKCG</b>                                                                                           | 3           |
| Epinephrine         | adrenergic receptor agonist, carbonic anhydrase activator, neurotransmitter                                                                   | <b>ADRA1A, ADRA1B, ADRA1D, ADRA2A, ADRA2B, ADRA2C, ADRB1, ADRB2, ADRB3, PAH, TNFA</b>                                                    | launched    |
| Ephedrine (racemic) | adrenergic receptor agonist                                                                                                                   | <b>ADRA1A, ADRA2A, ADRB1, ADRB2, ATF1, ATF2, ATF3, ATF4, ATF5, ATF6, ATF7, FOS, IL2, JDP2, JUN, NFATC1, SLC6A2, SLC6A3, SLC6A4, TNFA</b> | launched    |
| ER-27319            | mediator release inhibitor, SYK inhibitor                                                                                                     | <b>SYK</b>                                                                                                                               | preclinical |
| Erlotinib           | EGFR inhibitor                                                                                                                                | <b>EGFR, NR1I2</b>                                                                                                                       | launched    |

|                     |                                                            |                                                                                                                                                                                                                        |             |
|---------------------|------------------------------------------------------------|------------------------------------------------------------------------------------------------------------------------------------------------------------------------------------------------------------------------|-------------|
| Etanercept          | TNF- $\alpha$ receptor antagonist                          | <b>TNFR</b>                                                                                                                                                                                                            | launched    |
| Ethanolamine-oleate | immunostimulant                                            | <b>F12, FABP4, FFAR1, FFAR4, PLD2</b>                                                                                                                                                                                  | launched    |
| Ethoxzolamide       | carbonic anhydrase inhibitor                               | <b>CA1, CA12, CA13, CA14, CA2, CA3, CA4, CA5A, CA5B, CA6, CA7, CA9</b>                                                                                                                                                 | launched    |
| ETP-45658           | PI3K inhibitor                                             | <b>PIK3CA, PIK3CB, PIK3CD, PIK3CG</b>                                                                                                                                                                                  | preclinical |
| Eugenol             | AR antagonist                                              | <b>AR</b>                                                                                                                                                                                                              | launched    |
| Everolimus          | mTOR inhibitor                                             | <b>MTOR</b>                                                                                                                                                                                                            | launched    |
| Evobrutinib         | Bruton's tyrosine kinase (BTK) inhibitor                   | <b>BTK</b>                                                                                                                                                                                                             | 2           |
| Fedratinib          | FLT3 inhibitor, JAK inhibitor                              | <b>BRD4, JAK1, JAK2, JAK3, TYK2</b>                                                                                                                                                                                    | launched    |
| Fenebrutinib        | Bruton's tyrosine kinase (BTK) inhibitor                   | <b>BTK</b>                                                                                                                                                                                                             | 2           |
| Ferulic acid        | Antioxidant                                                | <b>CA1, CA12, CA14, CA2, CA4, CA6, CA9</b>                                                                                                                                                                             | 2           |
| Filgotinib          | JAK inhibitor                                              | <b>JAK1, JAK2, JAK3, TYK2</b>                                                                                                                                                                                          | 3           |
| Flufenamic acid     | chloride channel blocker                                   | <b>AKR1C3, ANO1, AR, GJA1, GJA10, GJA3, GJA4, GJA5, GJA8, GJA9, GJB1, GJB2, GJB3, GJB4, GJB5, GJB6, GJB7, GJC1, GJC2, GJC3, GJD2, GJD3, GJD4, GJE1, PANX1, PANX2, PANX3, PKD2L1, PTGS1, PTGS2, TRPC5, TRPM2, TRPM5</b> | preclinical |
| Flutamide           | Androgen receptor antagonist                               | <b>AR, AHR</b>                                                                                                                                                                                                         | launched    |
| Fostamatinib        | SYK inhibitor                                              | <b>SYK</b>                                                                                                                                                                                                             | launched    |
| Gallic acid         | beta-amyloid protein neurotoxicity inhibitor, PPAR agonist | <b>CA1, CA12, CA14, CA2, CA4, CA6, CA9, SELP</b>                                                                                                                                                                       | preclinical |
| Ganoderic-acid-a    | JAK inhibitor                                              | <b>JAK1, JAK2, JAK3</b>                                                                                                                                                                                                | preclinical |
| GDC-0068            | AKT inhibitor                                              | <b>AKT1, AKT2, AKT3, PRKG1</b>                                                                                                                                                                                         | 3           |
| GDC-0834            | Bruton's tyrosine kinase (BTK) inhibitor                   | <b>BTK</b>                                                                                                                                                                                                             | 1           |
| GDC-0941            | PI3K inhibitor                                             | <b>PIK3CA, PIK3CB, PIK3CD, PIK3CG</b>                                                                                                                                                                                  | 2           |
| GDC-0980            | mTOR inhibitor, PI3K inhibitor                             | <b>FGR, MAP3K9, MTOR, PIK3CA, PIK3CB, PIK3CD, PIK3CG, SYK</b>                                                                                                                                                          | 2           |
| Gefitinib           | EGFR inhibitor                                             | <b>EGFR</b>                                                                                                                                                                                                            | launched    |
| Genistein           | tyrosine kinase inhibitor                                  | <b>CFD, CFT, DEFB4B, ESR1, ESR2, ESRRA, ESRRB, ESRRG, GJB2, MMP1, NCOA1, NCOA2, PI3, PPARG, PTK2B, TOP2A, TRPC5</b>                                                                                                    | 3           |
| GK921               | transglutaminase inhibitor                                 | <b>TGM2</b>                                                                                                                                                                                                            | preclinical |
| Glipizide           | sulfonylurea                                               | <b>ABCC8, KCNJ10, KCNJ11, PPARG</b>                                                                                                                                                                                    | launched    |
| Glycitein           | tumor necrosis factor release inhibitor                    | <b>TNFA</b>                                                                                                                                                                                                            | 3           |
| Glucosamine         | glycosylated protein precursor                             | <b>IL1B</b>                                                                                                                                                                                                            | launched    |
| Golimumab           | TNF inhibitor                                              | <b>TNFA</b>                                                                                                                                                                                                            | launched    |
| GS-9973             | SYK inhibitor                                              | <b>SYK</b>                                                                                                                                                                                                             | 2           |
| GSK2110183          | AKT inhibitor                                              | <b>AKT1, AKT2, AKT3</b>                                                                                                                                                                                                | 2           |
| GSK2126458          | mTOR inhibitor, PI3K inhibitor                             | <b>MTOR, PIK3CA, PIK3CB, PIK3CD, PIK3CG</b>                                                                                                                                                                            | 1           |
| GSK2190915          | lipoxygenase inhibitor                                     | <b>ALOX5AP</b>                                                                                                                                                                                                         | 2           |
| GSK690693           | AKT inhibitor                                              | <b>AKT1, AKT2, AKT3, PAK4P, PAK6, PAK7, PRKCQ, PRKG1, PRKX</b>                                                                                                                                                         | 1           |
| GW-1929             | PPAR $\gamma$ agonist                                      | <b>PPARG</b>                                                                                                                                                                                                           | preclinical |
| GW-3965             | Liver X receptor agonist                                   | <b>NR1H2, NR1H3</b>                                                                                                                                                                                                    | preclinical |
| Halofuginone        | collagenase inhibitor                                      | <b>COL1A1, MMP2</b>                                                                                                                                                                                                    | launched    |
| Hemomex-s           | PPAR $\gamma$ agonist                                      | <b>PPARG</b>                                                                                                                                                                                                           | launched    |

|                           |                                                                                       |                                                                                                                |             |
|---------------------------|---------------------------------------------------------------------------------------|----------------------------------------------------------------------------------------------------------------|-------------|
| Hexamethylenebisacetamide | AKT inhibitor, differentiation inducer, NFκB pathway inhibitor                        | <b>AKT1</b>                                                                                                    | 2           |
| Honokiol                  | AKT inhibitor                                                                         | <b>ALOX5</b> , PTGS1, PTGS2                                                                                    | 3           |
| Hydroxychloroquine        | antimalarial agent                                                                    | TLR7, <b>TLR9</b>                                                                                              | launched    |
| Hypoestoxide              | IKK inhibitor                                                                         | IKKBK, <b>IL1B</b> , TNFA                                                                                      | 1           |
| I-BET151                  | bromodomain inhibitor                                                                 | BRD2, BRD3, <b>BRD4</b>                                                                                        | preclinical |
| I-BET-762                 | bromodomain inhibitor                                                                 | BRD2, BRD3, <b>BRD4</b>                                                                                        | 2           |
| Ibrutinib                 | Bruton's tyrosine kinase (BTK) inhibitor                                              | BLK, BMX, <b>BTK</b>                                                                                           | launched    |
| Ibudilast                 | leukotriene receptor antagonist, phosphodiesterase inhibitor                          | <b>IL1B</b> , <b>IL6</b> , PDE3A, PDE4A, PDE4B, PDE4C, PDE4D, PDE5A                                            | launched    |
| Ibuproxam                 | cyclooxygenase inhibitor, prostaglandin inhibitor                                     | <b>ALOX5</b>                                                                                                   | launched    |
| Icosapent                 | platelet aggregation inhibitor                                                        | ACSL3, ACSL4, FADS1, FFAR1, PPARG, <b>PPARG</b> , <b>PTGS1</b> , <b>PTGS2</b> , SLC8A1, <b>TRPV1</b>           | launched    |
| Icotinib                  | EGFR inhibitor                                                                        | <b>EGFR</b>                                                                                                    | launched    |
| ID-1101                   | insulin sensitizer                                                                    | <b>INS</b>                                                                                                     | 1           |
| Idelalisib                | PI3K inhibitor                                                                        | PIK3CA, PIK3CB, <b>PIK3CD</b> , PIK3CG                                                                         | launched    |
| Ilomastat                 | matrix metalloprotease inhibitor                                                      | CAN, ADAM28, <b>MMP1</b> , <b>MMP12</b> , MMP13, MMP14, MMP2, <b>MMP3</b> , <b>MMP8</b> , <b>MMP9</b>          | 3           |
| Iloprost                  | platelet aggregation inhibitor, prostanoid receptor agonist                           | PTGDR, PTGER1, PTGER2, PTGER3, PTGER4, PTGFR, PTGIR, <b>TBXA2R</b>                                             | launched    |
| INCB-3284                 | CC chemokine receptor antagonist                                                      | <b>CCR2</b>                                                                                                    | 2           |
| Indeglitazar              | PPAR agonist                                                                          | NCOA1, PPARA, PPARG, <b>PPARG</b>                                                                              | 2           |
| Indisulam                 | CDK inhibitor                                                                         | CA1, CA12, CA14, CA2, <b>CA6</b> , CA7, CA9                                                                    | 2           |
| Indomethacin              | cyclooxygenase inhibitor                                                              | GLO1, PLA2G2A, PPARA, <b>PPARG</b> , PTGDR2, PTGR2, <b>PTGS1</b> , <b>PTGS2</b> , SLC46A1                      | launched    |
| Infliximab                | TNF inhibitor                                                                         | <b>IL6</b> , TNFA                                                                                              | launched    |
| Itacitinib                | JAK inhibitor                                                                         | <b>JAK1</b>                                                                                                    | 3           |
| JAK3-inhibitor-V          | JAK inhibitor                                                                         | <b>JAK3</b>                                                                                                    | preclinical |
| JNJ-17203212              | TRPV antagonist                                                                       | <b>TRPV1</b>                                                                                                   | preclinical |
| JNJ-27141491              | CC chemokine receptor antagonist                                                      | <b>CCR2</b>                                                                                                    | preclinical |
| JQ1-(+)                   | bromodomain inhibitor                                                                 | <b>BRD4</b> , BRDT                                                                                             | preclinical |
| JTE-607                   | cytokine production inhibitor                                                         | <b>IL10</b> , <b>IL1B</b> , <b>IL6</b> , TNFA                                                                  | 2           |
| JW-67                     | WNT pathway inhibitor                                                                 | APC, <b>AXIN1</b> , GSK3B                                                                                      | preclinical |
| KN-62                     | calcium/calmodulin dependent protein kinase inhibitor, purinergic receptor antagonist | <b>AKT1</b> , CAMK2A, CHEK1, LCK, MAPK1, MAPK11, MAPK12, MAPK14, MAPK8, P2RX7, PRKCA, ROCK1, RPS6KB1, SGK1     | preclinical |
| KU-0063794                | mTOR inhibitor                                                                        | <b>MTOR</b>                                                                                                    | preclinical |
| L-alanine                 | Non-essential aminoacid                                                               | AARS, AARS2, <b>ABAT</b> , AGXT, AGXT2, GPRC6A, GPT, GPT2, <b>KYNU</b> , NFS1, PHYKPL, SLC1A4, SLC36A1, SLC7A8 | launched    |
| Laropiprant               | prostanoid receptor antagonist                                                        | PTGDR, PTGDR2, PTGER1, PTGER2, PTGER3, PTGFR, PTGIR, <b>TBXA2R</b>                                             | launched    |
| Latamoxef                 | cephalosporine                                                                        | <b>DACB</b> , MRCA, MRCA, <b>PBPC</b>                                                                          | launched    |
| Lauric acid               | bacterial permeability inducer                                                        | GPR84, HNF4A, LTF, LY96, PLA2G2A, <b>TLR4</b>                                                                  | 3           |



|                         |                                                                                                                    |                                                                                                                                                                                                                                                                                                                                                             |             |
|-------------------------|--------------------------------------------------------------------------------------------------------------------|-------------------------------------------------------------------------------------------------------------------------------------------------------------------------------------------------------------------------------------------------------------------------------------------------------------------------------------------------------------|-------------|
| L-cysteinesulfinic acid | glutamate receptor agonist                                                                                         | GRM1, GRM5, GSR, <b>HMGCS2</b> , PAPOLA, PRDX2                                                                                                                                                                                                                                                                                                              | preclinical |
| LDN-27219               | transglutaminase inhibitor                                                                                         | <b>TGM2</b>                                                                                                                                                                                                                                                                                                                                                 | preclinical |
| Leflunomide             | dihydroorotate dehydrogenase inhibitor, PDGFR tyrosine kinase receptor inhibitor                                   | <b>AHR</b> , DHODH, PTK2B                                                                                                                                                                                                                                                                                                                                   | launched    |
| Lenalidomide            | tumor necrosis factor production inhibitor                                                                         | <b>TNFA</b>                                                                                                                                                                                                                                                                                                                                                 | launched    |
| LFM-A13                 | Bruton's tyrosine kinase (BTK) inhibitor                                                                           | <b>BTK</b>                                                                                                                                                                                                                                                                                                                                                  | preclinical |
| Licofelone              | cyclooxygenase inhibitor, lipoxigenase inhibitor                                                                   | <b>ALOX5</b> , PLA2G2E, PTGS2                                                                                                                                                                                                                                                                                                                               | 3           |
| Ligustilide             | tumor necrosis factor production inhibitor                                                                         | <b>TNFA</b>                                                                                                                                                                                                                                                                                                                                                 | preclinical |
| Linifanib               | PDGFR tyrosine kinase receptor inhibitor, VEGFR inhibitor                                                          | <b>CSF1</b> , CSF1R, FLT1, FLT3, FLT4, KDR, KIT, PDGFRB, RET, TEK                                                                                                                                                                                                                                                                                           | 3           |
| Linoleic acid           | oxidative stress inducer                                                                                           | <b>FABP4</b> , FFAR, FFAR4, HNF4A, KCNB1, <b>PPARG</b> , TRPM8                                                                                                                                                                                                                                                                                              | 3           |
| Lupanine                | sodium channel blocker                                                                                             | <b>INS</b>                                                                                                                                                                                                                                                                                                                                                  | 1           |
| LXR-623                 | Liver X receptor agonist                                                                                           | <b>AR</b> , <b>NR1H2</b> , <b>NR1H3</b> , NR1I2, NR3C1                                                                                                                                                                                                                                                                                                      | 1           |
| LY2784544               | JAK inhibitor                                                                                                      | <b>JAK2</b> , <b>JAK3</b>                                                                                                                                                                                                                                                                                                                                   | 2           |
| LY294002                | DNA dependent protein kinase inhibitor, mTOR inhibitor, phosphodiesterase inhibitor, PI3K inhibitor, PLK inhibitor | <b>AKT1</b> , CHEK1, GSK3B, LCK, MAPK1, MAPK11, MAPK12, MAPK14, MAPK8, <b>MTOR</b> , PIK3CA, PIK3CB, <b>PIK3CD</b> , PIK3CG, PIM1, PLK1, PRKCA, PRKDC, ROCK1, RPS6KB1, SGK1                                                                                                                                                                                 | preclinical |
| LY3023414               | mTOR inhibitor, PI3K inhibitor                                                                                     | <b>MTOR</b>                                                                                                                                                                                                                                                                                                                                                 | 2           |
| LY303511                | casein kinase inhibitor, mTOR inhibitor, PI3K inhibitor                                                            | BRD2, BRD3, <b>BRD4</b>                                                                                                                                                                                                                                                                                                                                     | preclinical |
| Mafenide                | carbonic anhydrase inhibitor                                                                                       | CA12, CA14, CA2, CA4, <b>CA6</b> , CA9                                                                                                                                                                                                                                                                                                                      | launched    |
| Magnolol                | PPAR $\gamma$ agonist                                                                                              | GABRA1, <b>PPARG</b>                                                                                                                                                                                                                                                                                                                                        | preclinical |
| Maraviroc               | CC chemokine receptor antagonist                                                                                   | <b>CCR5</b>                                                                                                                                                                                                                                                                                                                                                 | launched    |
| Marimastat              | matrix metalloprotease inhibitor                                                                                   | <b>MMP1</b> , <b>MMP10</b> , MMP11, <b>MMP12</b> , MMP13, MMP14, MMP15, MMP16, MMP17, MMP19, MMP2, MMP20, MMP21, MMP23A, MMP24, MMP25, MMP26, MMP27, MMP28, <b>MMP3</b> , MMP7, <b>MMP8</b> , <b>MMP9</b>                                                                                                                                                   | 3           |
| MC-1                    | purinergic receptor inhibitor, intracellular Ca <sup>2+</sup> influx inhibitor                                     | AADAT, ABAT, AGXT, AGXT2, ALAS1, AZIN2, BCAT1, BCAT2, CBS, CCBL1, CCBL2, CSAD, CTH, DDC, FTCD, GAD1, GAD2, GADL1, GCAT, GLDC, GOT1, GOT2, GPT, GPT2, HDC, IGSF10, <b>KYNU</b> , MOCOS, NFS1, OAT, ODC1, PDXDC1, PDXP, PHYKPL, PNPO, PROSC, PSAT1, PYGB, PYGL, PYGM, SCLY, SDS, SDSL, SEPSECS, SGPL1, SHMT1, SHMT2, SPTLC1, SPTLC2, SPTLC3, SRR, TAT, THNSL1 | 3           |
| Masoprocol              | lipoxigenase inhibitor                                                                                             | <b>ALOX5</b>                                                                                                                                                                                                                                                                                                                                                | launched    |
| MCC950                  | NOD like receptor inhibitor                                                                                        | <b>NLRP3</b>                                                                                                                                                                                                                                                                                                                                                | preclinical |
| Meclofenamic acid       | cyclooxygenase inhibitor, prostanoid receptor antagonist                                                           | <b>ALOX5</b> , CNR1, KCNQ2, KCNQ3, PTGS1, PTGS2                                                                                                                                                                                                                                                                                                             | launched    |
| Meglitinide             | potassium channel blocker                                                                                          | <b>CCR2</b>                                                                                                                                                                                                                                                                                                                                                 | 2           |
| Meisoindigo             | STAT inhibitor                                                                                                     | <b>STAT3</b>                                                                                                                                                                                                                                                                                                                                                | 3           |

|                         |                                                                                        |                                                                                                                                                                                                  |             |
|-------------------------|----------------------------------------------------------------------------------------|--------------------------------------------------------------------------------------------------------------------------------------------------------------------------------------------------|-------------|
| Mesalazine              | cyclooxygenase inhibitor,<br>lipoxygenase inhibitor,<br>prostanoid receptor antagonist | <b>ALOX5</b> , <b>CHUK</b> , <b>IKBKB</b> , <b>MPO</b> , <b>PPARG</b> ,<br><b>PTGS1</b> , <b>PTGS2</b>                                                                                           | launched    |
| Metacresol              | phenol derivative                                                                      | <b>INS</b>                                                                                                                                                                                       | launched    |
| Metformin               | insulin sensitizer                                                                     | <b>ACACB</b> , <b>PRKAB1</b>                                                                                                                                                                     | launched    |
| Mimosine                | DNA replication inhibitor                                                              | <b>CCL2</b> , <b>SHMT1</b> , <b>SHMT2</b> , <b>TYR</b>                                                                                                                                           | preclinical |
| Mitiglinide             | insulin secretagogue                                                                   | <b>ABCC8</b> , <b>KCNJ10</b> , <b>PPARG</b>                                                                                                                                                      | launched    |
| MK-0812                 | CC chemokine receptor<br>antagonist                                                    | <b>CCR2</b>                                                                                                                                                                                      | 2           |
| MK-2206                 | AKT inhibitor                                                                          | <b>AKT1</b> , <b>AKT2</b> , <b>AKT3</b>                                                                                                                                                          | 2           |
| MK-2295                 | TRPV antagonist                                                                        | <b>TRPV1</b>                                                                                                                                                                                     | 2           |
| MK-2461                 | FGFR inhibitor, VEGFR inhibitor                                                        | <b>FGFR1</b> , <b>FGFR2</b> , <b>FGFR3</b> , <b>FLT1</b> , <b>FLT3</b> , <b>FLT4</b> ,<br><b>KDR</b> , <b>MERTK</b> , <b>MET</b> , <b>MST1R</b> , <b>NTRK1</b> ,<br><b>NTRK2</b> , <b>PDGFRB</b> | 1 / 2       |
| MLN0128                 | mTOR inhibitor                                                                         | <b>MTOR</b> , <b>PIK3CA</b> , <b>PIK3CD</b> , <b>PIK3CG</b>                                                                                                                                      | 2           |
| Monepantel              | mTOR inhibitor                                                                         | <b>MTOR</b>                                                                                                                                                                                      | preclinical |
| Montelukast             | leukotriene receptor antagonist                                                        | <b>ALOX5</b> , <b>CYSLTR1</b>                                                                                                                                                                    | launched    |
| MRK-560                 | $\gamma$ -secretase inhibitor                                                          | <b>APP</b>                                                                                                                                                                                       | preclinical |
| Naloxone                | opioid receptor antagonist                                                             | <b>CREB1</b> , <b>ESR1</b> , <b>OPRD1</b> , <b>OPRK1</b> , <b>OPRM</b> ,<br><b>TLR4</b>                                                                                                          | launched    |
| Napabucasin             | STAT inhibitor                                                                         | <b>STAT3</b>                                                                                                                                                                                     | 3           |
| Nateglinide             | insulin secretagogue                                                                   | <b>ABCC8</b> , <b>KCNJ10</b> , <b>KCNJ11</b> , <b>PPARG</b>                                                                                                                                      | launched    |
| Niclosamide             | DNA replication inhibitor, STAT<br>inhibitor                                           | <b>STAT3</b>                                                                                                                                                                                     | launched    |
| Nilutamide              | AR antagonist                                                                          | <b>AR</b>                                                                                                                                                                                        | launched    |
| NLG919                  | indoleamine 2,3-dioxygenase<br>inhibitor <b>IDO1</b>                                   | <b>IDO1</b>                                                                                                                                                                                      | 1           |
| NDT-9513727             | complement antagonist                                                                  | <b>C5AR1</b>                                                                                                                                                                                     | preclinical |
| NS-018                  | JAK inhibitor                                                                          | <b>JAK1</b> , <b>JAK2</b> , <b>JAK3</b> , <b>TYK2</b>                                                                                                                                            | 1 / 2       |
| NS-309                  | calcium-activated potassium<br>channel activator                                       | <b>KCNN1</b> , <b>KCNN2</b> , <b>KCNN3</b> , <b>KCNN4</b>                                                                                                                                        | preclinical |
| NS-8593                 | calcium-activated potassium<br>channel modulator                                       | <b>KCNN1</b> , <b>KCNN2</b> , <b>KCNN3</b>                                                                                                                                                       | preclinical |
| NSC-405020              | matrix metalloprotease inhibitor                                                       | <b>MMP1</b>                                                                                                                                                                                      | preclinical |
| nTZDpa                  | PPAR $\gamma$ agonist                                                                  | <b>PPARG</b>                                                                                                                                                                                     | preclinical |
| NVP-BEZ235              | mTOR inhibitor, PI3K inhibitor                                                         | <b>ATR</b> , <b>MTOR</b> , <b>PIK3CA</b> , <b>PIK3CD</b> , <b>PIK3CG</b>                                                                                                                         | 3           |
| NVP-BSK805              | JAK inhibitor                                                                          | <b>JAK2</b>                                                                                                                                                                                      | preclinical |
| Ochromycinone           | STAT inhibitor                                                                         | <b>STAT3</b>                                                                                                                                                                                     | 2           |
| Olmudinib               | Bruton's tyrosine kinase (BTK)<br>inhibitor, EGFR inhibitor                            | <b>BTK</b> , <b>EGFR</b>                                                                                                                                                                         | launched    |
| Olopatadine             | histamine receptor antagonist                                                          | <b>HRH1</b> , <b>S100A1</b> , <b>S100A12</b> , <b>S100A13</b> ,<br><b>S100A2</b> , <b>S100B</b>                                                                                                  | launched    |
| Olsalazine              | cyclooxygenase inhibitor                                                               | <b>IFNG</b> , <b>TPMT</b>                                                                                                                                                                        | launched    |
| ONO-4059                | Bruton's tyrosine kinase (BTK)<br>inhibitor                                            | <b>BTK</b>                                                                                                                                                                                       | 1           |
| ONO-4817                | matrix metalloprotease inhibitor                                                       | <b>MMP8</b>                                                                                                                                                                                      | 1           |
| OSI-027                 | mTOR inhibitor                                                                         | <b>MTOR</b>                                                                                                                                                                                      | 1           |
| Osimertinib             | EGFR inhibitor                                                                         | <b>EGFR</b>                                                                                                                                                                                      | launched    |
| OTX015                  | bromodomain inhibitor                                                                  | <b>BRD2</b> , <b>BRD3</b> , <b>BRD4</b>                                                                                                                                                          | 1 / 2       |
| OXF-BD-02               | bromodomain inhibitor                                                                  | <b>BRD4</b>                                                                                                                                                                                      | preclinical |
| Pacritinib              | FLT3 inhibitor, JAK inhibitor                                                          | <b>FLT3</b> , <b>JAK1</b> , <b>JAK2</b> , <b>JAK3</b>                                                                                                                                            | 3           |
| Palomid-529             | AKT inhibitor, mTOR inhibitor                                                          | <b>MTOR</b>                                                                                                                                                                                      | 1           |
| Paquinimod              | S100A9 inhibitor                                                                       | <b>S100A9</b>                                                                                                                                                                                    | 2           |
| Para-toluenesulfonamide | G1 cell cycle arrest inducer                                                           | <b>CA12</b> , <b>CA2</b> , <b>CA6</b> , <b>CA9</b>                                                                                                                                               | 3           |

|                     |                                                                          |                                                                                                                                                                                                                       |             |
|---------------------|--------------------------------------------------------------------------|-----------------------------------------------------------------------------------------------------------------------------------------------------------------------------------------------------------------------|-------------|
| Paclitaxel          | tubulin polymerization inhibitor                                         | BCL2, MAP2, MAP4, MAPT, NR1I2, <b>TLR4</b> , TUBA1A, TUBA1B, TUBA1C, TUBA3C, TUBA3D, TUBA3E, TUBA4A, TUBB, TUBB1, TUBB2A, TUBB2B, TUBB3, TUBB4A, TUBB4B, TUBB6, TUBB8                                                 | launched    |
| Paracetamol         | cyclooxygenase inhibitor                                                 | FAAH, <b>PTGS1</b> , <b>PTGS2</b> , <b>TRPV1</b>                                                                                                                                                                      | launched    |
| Pazopanib           | KIT inhibitor, PDGFR tyrosine kinase receptor inhibitor, VEGFR inhibitor | CSF1R, <b>FGF1</b> , FGFR1, FGFR3, FLT1, FLT4, <b>ITK</b> , KDR, KIT, PDGFRA, PDGFRB, SH2B3                                                                                                                           | launched    |
| PCI-29732           | Bruton's tyrosine kinase (BTK) inhibitor                                 | <b>BTK</b>                                                                                                                                                                                                            | preclinical |
| PD1-PDL-inhibitor-1 | programmed death ligand inhibitor                                        | <b>CD274</b>                                                                                                                                                                                                          | preclinical |
| PD-166793           | collagenase inhibitor, metalloproteinase inhibitor                       | MMP13, MMP2, <b>MMP3</b>                                                                                                                                                                                              | preclinical |
| PD-98059            | MEK inhibitor                                                            | <b>AKT1</b> , CHEK1, GSK3B, LCK, MAP2K1, MAPK1, MAPK11, MAPK12, MAPK14, MAPK8, PRKCA, RAF1, ROCK1, RPS6KB1, SGK1                                                                                                      | preclinical |
| Peficitinib         | JAK inhibitor                                                            | <b>JAK1</b> , <b>JAK2</b> , <b>JAK3</b>                                                                                                                                                                               | launched    |
| Pentoxifylline      | phosphodiesterase inhibitor                                              | ADORA, ADORA2A, ADORA2B, ADORA2B, NT5E, PDE10A, PDE1A, PDE1B, PDE1C, PDE2A, PDE3A, PDE3B, PDE4A, PDE4B, PDE4C, PDE4D, PDE5A, PDE6A, PDE6B, PDE6C, PDE6D, PDE6G, PDE6H, PDE7A, PDE7B, PDE8A, PDE8B, PDE9A, <b>TNFA</b> | launched    |
| Perifosine          | AKT inhibitor                                                            | <b>AKT1</b>                                                                                                                                                                                                           | 3           |
| PF-04691502         | mTOR inhibitor, PI3K inhibitor                                           | <b>MTOR</b> , PIK3CA                                                                                                                                                                                                  | 2           |
| PF-05212384         | mTOR inhibitor, PI3K inhibitor                                           | <b>MTOR</b> , PIK3CA                                                                                                                                                                                                  | 2           |
| PF-06651600         | JAK inhibitor                                                            | <b>JAK1</b> , <b>JAK2</b> , <b>JAK3</b>                                                                                                                                                                               | 2 / 3       |
| PFI-1               | bromodomain inhibitor                                                    | <b>BRD4</b>                                                                                                                                                                                                           | preclinical |
| PI-103              | mTOR inhibitor, PI3K inhibitor                                           | <b>MTOR</b> , PIK3CA, PIK3CB, <b>PIK3CD</b> , PIK3CG, PRKDC                                                                                                                                                           | preclinical |
| PIK-293             | PI3K inhibitor                                                           | PIK3CA, PIK3CB, <b>PIK3CD</b> , PIK3CG                                                                                                                                                                                | preclinical |
| PIK-294             | PI3K inhibitor                                                           | PIK3CB, <b>PIK3CD</b> , PIK3CG                                                                                                                                                                                        | preclinical |
| PIK-75              | DNA protein kinase inhibitor, PI3K inhibitor                             | PIK3CA, PIK3CB, <b>PIK3CD</b> , PIK3CG, PRKDC                                                                                                                                                                         | preclinical |
| Pioglitazone        | insulin sensitizer, PPAR $\gamma$ agonist                                | <b>PPARG</b> , <b>ADIPOQ</b> , TRPM3                                                                                                                                                                                  | launched    |
| Pirfenidone         | TGF beta receptor inhibitor                                              | <b>FURIN</b> , <b>TNFA</b>                                                                                                                                                                                            | launched    |
| PKI-179             | mTOR inhibitor, PI3K inhibitor                                           | <b>MTOR</b>                                                                                                                                                                                                           | 1           |
| Plerixafor          | CC chemokine receptor antagonist                                         | ACKR3, <b>CCR4</b> , CXCR4, <b>MMP1</b> , <b>PI3</b>                                                                                                                                                                  | launched    |
| PP-121              | protein tyrosine kinase inhibitor                                        | ABL1, <b>EGFR</b> , HCK, KDR, <b>MTOR</b> , PDGFRA, PIK3CA, PIK3CB, <b>PIK3CD</b> , PIK3CG, PRKDC, SRC                                                                                                                | preclinical |
| PP242               | mTOR inhibitor                                                           | <b>MTOR</b> , PASK                                                                                                                                                                                                    | preclinical |
| Pranlukast          | leukotriene receptor antagonist                                          | CYSLTR1, CYSLTR2, <b>IL5</b> , MUC2, <b>NFKB1</b> , RNASE3, <b>TNFA</b>                                                                                                                                               | launched    |
| PRN1008             | Bruton's tyrosine kinase (BTK) inhibitor                                 | <b>BTK</b>                                                                                                                                                                                                            | preclinical |
| PRT062070           | JAK inhibitor, SYK inhibitor                                             | FGR, MAP3K9, <b>SYK</b>                                                                                                                                                                                               | 2 / 3       |
| PRT062607           | SYK inhibitor                                                            | <b>SYK</b>                                                                                                                                                                                                            | 2           |
| Pyrvinium pamoate   | AR antagonist                                                            | <b>AR</b>                                                                                                                                                                                                             | launched    |

|                    |                                                            |                                                                                                                                                                                      |             |
|--------------------|------------------------------------------------------------|--------------------------------------------------------------------------------------------------------------------------------------------------------------------------------------|-------------|
| Quilflapon         | leukotriene synthesis inhibitor                            | <b>ALOX5, ALOX5AP</b>                                                                                                                                                                | 2           |
| R112               | SYK inhibitor                                              | <b>SYK</b>                                                                                                                                                                           | 1           |
| R406               | SYK inhibitor                                              | <b>RET, SYK</b>                                                                                                                                                                      | 1           |
| Repaglinide        | insulin secretagogue                                       | <b>ABCC8, KCNJ11, PPARG</b>                                                                                                                                                          | launched    |
| Resatorvid         | toll-like receptor inhibitor                               | <b>TLR4</b>                                                                                                                                                                          | 3           |
| REV-5901           | leukotriene receptor antagonist,<br>lipoxygenase inhibitor | <b>ALOX5</b>                                                                                                                                                                         | 2           |
| RGB-286638         | CDK inhibitor                                              | <b>CDK1, CDK2, CDK3, CDK4, CDK5, CDK6,<br/>CDK7, CDK9, FLT3, GSK3B, JAK2,<br/>MAP3K7, MAPK9</b>                                                                                      | 1           |
| RGX-104            | Liver X receptor agonist                                   | <b>LXR</b>                                                                                                                                                                           | 1           |
| Ro-90-7501         | $\beta$ -amyloid protein neurotoxicity<br>inhibitor        | <b>APP</b>                                                                                                                                                                           | preclinical |
| Rovazolac          | liver X receptor agonist                                   | <b>LXR</b>                                                                                                                                                                           | preclinical |
| RS-102895          | CCR antagonist                                             | <b>CCR2</b>                                                                                                                                                                          | preclinical |
| RS-504393          | CC chemokine receptor<br>antagonist                        | <b>CCL2, CCR2</b>                                                                                                                                                                    | preclinical |
| RU-58841           | AR inhibitor                                               | <b>AR</b>                                                                                                                                                                            | 2           |
| Ruxolitinib        | JAK inhibitor                                              | <b>JAK1, JAK2, JAK3, TYK2</b>                                                                                                                                                        | launched    |
| Ruxolitinib-(S)    | JAK inhibitor                                              | <b>JAK1, JAK2</b>                                                                                                                                                                    | preclinical |
| S26948             | PPAR $\gamma$ agonist                                      | <b>PPARG</b>                                                                                                                                                                         | preclinical |
| Saroglitazar       | PPAR agonist                                               | <b>PPARA, PPARG</b>                                                                                                                                                                  | launched    |
| Salvianolic acid-B | EGFR inhibitor,<br>metalloproteinase inhibitor             | <b>MMP9</b>                                                                                                                                                                          | 2           |
| SAR-245409         | PI3K inhibitor                                             | <b>MTOR, PIK3CG</b>                                                                                                                                                                  | 1 / 2       |
| SB-202190          | p38 MAPK inhibitor                                         | <b>AKT1, ALOX5, CHEK1, GSK3B, LCK,<br/>MAPK1, MAPK11, MAPK12, MAPK14,<br/>MAPK8, PRKCA, ROCK1, RPS6KB1,<br/>SGK1</b>                                                                 | preclinical |
| SB-203580          | p38 MAPK inhibitor                                         | <b>AKT1, ALOX5, CHEK1, CYP2D6,<br/>CYP3A4, GAK, GSK3B, LCK, MAPK1,<br/>MAPK10, MAPK11, MAPK12, MAPK14,<br/>MAPK8, MAPK9, PRKCA, RAF1, RIPK2,<br/>ROCK1, RPS6KB1, SGK1, SRC, TNFA</b> | preclinical |
| SB-2343            | mTOR inhibitor, PI3K inhibitor                             | <b>MTOR, PIK3CA, PIK3CB, PIK3CD,<br/>PIK3CG</b>                                                                                                                                      | 1           |
| SB-366791          | TRPV antagonist                                            | <b>TRPV1</b>                                                                                                                                                                         | preclinical |
| SB-452533          | TRPV antagonist                                            | <b>TRPV1</b>                                                                                                                                                                         | preclinical |
| SB-705498          | TRPV antagonist                                            | <b>TRPV1</b>                                                                                                                                                                         | preclinical |
| SB-747651A         | kinase inhibitor                                           | <b>AKT1, AKT3, ROCK1, RPS6KA5,<br/>RPS6KB1</b>                                                                                                                                       | preclinical |
| SC-12267           | dihydroorotate dehydrogenase<br>inhibitor                  | <b>IL17A</b>                                                                                                                                                                         | 2           |
| SD-2590            | matrix metalloprotease inhibitor                           | <b>MMP1, MMP13, MMP2</b>                                                                                                                                                             | preclinical |
| SEN-1269           | $\beta$ -amyloid inhibitor                                 | <b>APP</b>                                                                                                                                                                           | preclinical |
| Silibinin          | cytochrome P450 inhibitor                                  | <b>ALOX5</b>                                                                                                                                                                         | launched    |
| Sirolimus          | mTOR inhibitor                                             | <b>CFD1, FKBP1A, GPD1, MMP1, MTOR,<br/>PI3, RPL38</b>                                                                                                                                | launched    |
| SirReal-2          | SIRT inhibitor                                             | <b>SIRT2</b>                                                                                                                                                                         | preclinical |
| SKF-86002          | p38 MAPK inhibitor                                         | <b>ALOX5, MAPK14</b>                                                                                                                                                                 | preclinical |
| SKF-96365          | calcium channel blocker                                    | <b>CYP3A4, PKD2, TRPC1, TRPC3, TRPC4,<br/>TRPC5, TRPV2</b>                                                                                                                           | preclinical |
| Solcitinib         | JAK inhibitor                                              | <b>JAK1</b>                                                                                                                                                                          | 1           |
| SP-100030          | NFkB pathway inhibitor                                     | <b>JUN, NFKB1</b>                                                                                                                                                                    | preclinical |

|                    |                                                    |                                                                                                                   |             |
|--------------------|----------------------------------------------------|-------------------------------------------------------------------------------------------------------------------|-------------|
| Spermine           | Cellular metabolism                                | CA14, CA4, <b>CA6</b> , CA9, CASR, GRIN1, GRIN2A, KCNJ4, ODC1, SMOX, SMS, TRPM4, TRPM5                            | preclinical |
| SR-1664            | PPAR ligand                                        | <b>PPARG</b>                                                                                                      | preclinical |
| SR-2211            | retinoid receptor inverse agonist                  | <b>RORC</b>                                                                                                       | preclinical |
| SRT1720            | SIRT activator                                     | <b>SIRT1</b>                                                                                                      | preclinical |
| SRT2104            | SIRT activator                                     | <b>SIRT1</b>                                                                                                      | 2           |
| ST-2825            | myeloid differentiation primary response inhibitor | <b>MYD88</b>                                                                                                      | preclinical |
| STA-5326           | interleukin synthesis inhibitor                    | <b>IL12A</b>                                                                                                      | 2           |
| STAT3 inhibitor-VI | STAT inhibitor                                     | <b>STAT3</b>                                                                                                      | preclinical |
| Stemregenin-1      | Aryl hydrocarbon receptor antagonist               | <b>AHR</b>                                                                                                        | preclinical |
| Sulfasalazine      | cyclooxygenase inhibitor                           | ACAT1, <b>ALOX5</b> , CHUK, IKBKB, PLA2G1B, <b>PPARG</b> , <b>PTGS1</b> , <b>PTGS2</b> , SLC46A1, SLC7A11, TBXAS1 | launched    |
| T-0901317          | Liver X receptor agonist                           | NCOA1, NCOA2, <b>NR1H2</b> , <b>NR1H3</b> , NR1I2, RXRB                                                           | preclinical |
| TAK-220            | CC chemokine receptor antagonist                   | <b>CCR5</b>                                                                                                       | 1           |
| Talmapimod         | p38 MAPK inhibitor                                 | <b>IL1B</b> , MAPK11, MAPK14, MT-CO2, <b>TNFA</b>                                                                 | 2           |
| Tanshinone-I       | AP inhibitor                                       | <b>IFNG</b>                                                                                                       | 2           |
| Tanshinone-IIA     | anti-inflammatory agent, interleukin inhibitor     | <b>IL1B</b> , NR1I2, <b>TNFA</b>                                                                                  | 2 / 3       |
| Tapinarof          | aryl hydrocarbon receptor agonist                  | <b>AHR</b>                                                                                                        | 3           |
| Taxifolin          | opioid receptor antagonist                         | <b>ADIPOR2</b>                                                                                                    | 2           |
| TCS-21311          | JAK inhibitor                                      | <b>JAK3</b>                                                                                                       | preclinical |
| Teijin compound-1  | CC chemokine receptor antagonist                   | <b>CCR2</b>                                                                                                       | preclinical |
| Telmisartan        | angiotensin receptor antagonist                    | AGTR1, <b>PPARG</b>                                                                                               | launched    |
| Temsirolimus       | mTOR inhibitor                                     | <b>MTOR</b>                                                                                                       | launched    |
| Tepoxalin          | cyclooxygenase inhibito, lipoxygenase inhibitor    | <b>ALOX5</b>                                                                                                      | launched    |
| Terreic-acid(-)    | Bruton's tyrosine kinase (BTK) inhibitor           | <b>BTK</b>                                                                                                        | preclinical |
| Tesaglitazar       | insulin sensitizer, PPAR agonist                   | PPARA, <b>PPARG</b>                                                                                               | 3           |
| Thalidomide        | tumor necrosis factor production inhibitor         | <b>HGF</b> , <b>TNFA</b>                                                                                          | launched    |
| Thiram             | JAK inhibitor                                      | <b>JAK2</b>                                                                                                       | launched    |
| TG-02              | CDK inhibitor, FLT3 inhibitor, JAK inhibitor       | CDK1, CDK2, CDK7, CDK9, FLT3, <b>JAK2</b>                                                                         | 1 / 2       |
| TG100-115          | PI3K inhibitor                                     | PIK3CA, PIK3CB, <b>PIK3CD</b> , PIK3CG                                                                            | 1 / 2       |
| TG-101209          | JAK inhibitor                                      | <b>JAK2</b> , <b>JAK3</b>                                                                                         | preclinical |
| TGX-221            | PI3K inhibitor                                     | PIK3CB, <b>PIK3CD</b>                                                                                             | preclinical |
| TIC10              | AKT inhibitor, TRIL modulator                      | <b>AKT1</b> , MAPK1                                                                                               | 2           |
| Tofacitinib        | JAK inhibitor                                      | <b>JAK1</b> , <b>JAK2</b> , <b>JAK3</b>                                                                           | launched    |
| Topilutamide       | AR antagonist                                      | <b>AR</b>                                                                                                         | preclinical |
| Torin-1            | mTOR inhibitor                                     | <b>MTOR</b>                                                                                                       | preclinical |
| Torin-2            | mTOR inhibitor                                     | <b>MTOR</b>                                                                                                       | preclinical |
| Tramiprosate       | $\beta$ -amyloid protein neurotoxicity inhibitor   | <b>APP</b>                                                                                                        | 3           |
| Triciribine        | AKT inhibitor                                      | <b>AKT1</b> , AKT2, AKT3                                                                                          | 1 / 2       |

|              |                                                                                                |                                                                                                                                                                                  |             |
|--------------|------------------------------------------------------------------------------------------------|----------------------------------------------------------------------------------------------------------------------------------------------------------------------------------|-------------|
| Triflusal    | cyclooxygenase inhibitor,<br>platelet aggregation inhibitor,<br>thromboxane synthase inhibitor | <b>NFKB1, NOS2, PDE10A, PTGS1</b>                                                                                                                                                | launched    |
| Trofinetide  | cytokine production inhibitor                                                                  | <b>IFNG, IL6, TNFA</b>                                                                                                                                                           | 2           |
| Trometamol   | organic amine proton acceptor                                                                  | <b>AMD1, CANT1, DCN, NEIL1, VEGFA</b>                                                                                                                                            | launched    |
| U-0126       | MEK inhibitor                                                                                  | <b>AKT1, CHEK1, GSK3B, LCK, MAP2K1, MAP2K2, MAP2K7, MAPK1, MAPK11, MAPK12, MAPK14, MAPK8, PRKCA, RAF1, ROCK1, RPS6KB1, SGK1</b>                                                  | preclinical |
| UK-356618    | metalloproteinase inhibitor                                                                    | <b>MMP13, MMP14, MMP2, MMP3, MMP9</b>                                                                                                                                            | preclinical |
| Upadacitinib | JAK inhibitor                                                                                  | <b>JAK1, JAK2, JAK3</b>                                                                                                                                                          | launched    |
| Uprosertib   | AKT inhibitor                                                                                  | <b>AKT1, AKT2, AKT3</b>                                                                                                                                                          | 2           |
| Ustekinumab  | IL12/IL23 inhibitor                                                                            | <b>FSH, HCG, LH, LTA4H</b>                                                                                                                                                       | launched    |
| Vandetanib   | EGFR inhibitor, RET tyrosine<br>kinase inhibitor, VEGFR<br>inhibitor                           | <b>EGFR, EPHA1, EPHA10, EPHA2, EPHA3, EPHA4, EPHA5, EPHA6, EPHA7, EPHA8, EPHB1, EPHB2, EPHB3, EPHB4, EPHB6, ERBB2, ERBB3, ERBB4, FLT1, FLT4, KDR, PTK6, RET, SRC, TEK, VEGFA</b> | launched    |
| VE-822       | ATR kinase inhibitor                                                                           | <b>ATM, ATR, MTOR, PIK3CG</b>                                                                                                                                                    | 2           |
| Vecabrutinib | Bruton's tyrosine kinase (BTK)<br>inhibitor                                                    | <b>BTK</b>                                                                                                                                                                       | 1 / 2       |
| Veliflapon   | leukotriene synthesis inhibitor                                                                | <b>ALOX5AP</b>                                                                                                                                                                   | 3           |
| VGX-1027     | tumor necrosis factor receptor<br>antagonist                                                   | <b>TLR4</b>                                                                                                                                                                      | 1           |
| Vercirmon    | CC chemokine receptor<br>antagonist                                                            | <b>CCR9</b>                                                                                                                                                                      | 3           |
| Vicriviroc   | CC chemokine receptor<br>antagonist                                                            | <b>CCR5</b>                                                                                                                                                                      | 3           |
| Voxtalisib   | mTOR inhibitor, PI3K inhibitor                                                                 | <b>MTOR, PIK3CA</b>                                                                                                                                                              | 2           |
| VX-702       | p38 MAPK inhibitor                                                                             | <b>IL1B, IL6, MAPK11, MAPK12, MAPK14, TNFA</b>                                                                                                                                   | 2           |
| VX-765       | caspase inhibitor                                                                              | <b>CASP1</b>                                                                                                                                                                     | 2           |
| W-54011      | anaphylatoxin chemotactic<br>receptor antagonist                                               | <b>C5AR1</b>                                                                                                                                                                     | preclinical |
| WAY-200070   | estrogen receptor agonist                                                                      | <b>ERBB2, ERBB3, ERBB4, ESR2</b>                                                                                                                                                 | preclinical |
| WAY-600      | mTOR inhibitor                                                                                 | <b>MTOR</b>                                                                                                                                                                      | preclinical |
| WHI-P154     | JAK inhibitor                                                                                  | <b>EGFR, JAK1, JAK2, JAK3</b>                                                                                                                                                    | preclinical |
| Wortmannin   | PI3K inhibitor                                                                                 | <b>PI4KA, PI4KB, PIK3CA, PIK3CD, PIK3CG, PIK3R1, PLK1, PRKDC</b>                                                                                                                 | preclinical |
| WP1066       | STAT inhibitor                                                                                 | <b>STAT3</b>                                                                                                                                                                     | 1           |
| WP1130       | deubiquitinase inhibitor                                                                       | <b>JAK2, UCHL5, USP14, USP9X</b>                                                                                                                                                 | preclinical |
| WYE-125132   | mTOR inhibitor                                                                                 | <b>MTOR</b>                                                                                                                                                                      | preclinical |
| WYE-354      | mTOR inhibitor                                                                                 | <b>MTOR</b>                                                                                                                                                                      | preclinical |
| WYE-687      | mTOR inhibitor                                                                                 | <b>MTOR</b>                                                                                                                                                                      | preclinical |
| XD-14        | bromodomain inhibitor                                                                          | <b>BRD2, BRD3, BRD4, BRDT</b>                                                                                                                                                    | preclinical |
| XL019        | JAK inhibitor                                                                                  | <b>JAK1, JAK2, JAK3</b>                                                                                                                                                          | 1           |
| XL041        | liver X receptor agonist                                                                       | <b>LXR</b>                                                                                                                                                                       | preclinical |
| XL147        | PI3K inhibitor                                                                                 | <b>PIK3CA, PIK3CD, PIK3CG</b>                                                                                                                                                    | 2           |
| XL388        | mTOR inhibitor                                                                                 | <b>MTOR</b>                                                                                                                                                                      | preclinical |
| Y-320        | interleukin inhibitor                                                                          | <b>IL17A</b>                                                                                                                                                                     | preclinical |
| YM-90709     | IL5 inhibitor                                                                                  | <b>CSF2RB, IL5RA</b>                                                                                                                                                             | preclinical |
| Zileuton     | leukotriene synthesis inhibitor,<br>lipoxygenase inhibitor                                     | <b>ALOX5</b>                                                                                                                                                                     | launched    |
| ZM-39923     | JAK inhibitor                                                                                  | <b>JAK1, JAK3</b>                                                                                                                                                                | preclinical |



|             |                                                        |                                                                                                                                                                                                                                    |          |
|-------------|--------------------------------------------------------|------------------------------------------------------------------------------------------------------------------------------------------------------------------------------------------------------------------------------------|----------|
| Zonisamide  | sodium channel blocker, T-type calcium channel blocker | CA1, CA10, CA11, CA12, CA13, CA1, CA2, CA3, CA4, CA5A, CA5B, <b>CA6</b> , CA7, CA8, CA9, CACNA1G, CACNA1H, CACNA1I, MAOA, MAOB, SCN10A, SCN11A, SCN1A, SCN1B, SCN2A, SCN2B, SCN3A, SCN3B, SCN4A, SCN4B, SCN5A, SCN7A, SCN8A, SCN9A | launched |
| Zopolrestat | GLO1 inhibitor                                         | AKR1B1, <b>AKR1B10</b>                                                                                                                                                                                                             | 2        |
| ZSTK-474    | PI3K inhibitor                                         | PIK3CB, <b>PIK3CD</b> , PIK3CG                                                                                                                                                                                                     | 1 / 2    |
